# Supplementary material for: Transcriptome Analysis of Cytokinin Response in Tomato Leaves
Source: PLoS One. 2013 Jan 25;8(1):e55090. doi: 10.1371/journal.pone.0055090 (PMC3555872; doi:10.1371/journal.pone.0055090)
Supplement: Table S1 — Transcripts repressed by 2 h cytokinin treatment in both young and older leaves. The top 100 most highly repressed transcripts were shown in Table S4 and Table S5. (XLSX) [file pone.0055090.s001.xlsx]

## Sheet: Sheet1
Cytokinin repressed transcripts in young leaves (2h)				Cytokinin repressed transcripts in older leaves (2h)
ID	Solyc_ID	Solyc_Description	log2FC	ID	Solyc_ID	Solyc_Description	log2FC
BPA_Rashotte_Tomato_2885	Solyc05g015920	GYF domain-containing protein (AHRD V1 ***- D7KBQ1_ARALY)%3B contains Interpro domain(s) IPR003169 GYF	-5.68028	BPA_Rashotte_Tomato_1313	Solyc01g099950	Pectinesterase (AHRD V1 ***- B9I9P7_POPTR)%3B contains Interpro domain(s) IPR000070 Pectinesterasecatalytic	-3.50343
BPA_Rashotte_Tomato_24664	Solyc09g009390	Monodehydroascorbate reductase (NADH)-like protein (AHRD V1 **** Q0WUJ1_ARATH)%3B contains Interpro domain(s) IPR013027 FAD-dependent pyridine nucleotide-disulphide oxidoreductase	-5.6629	BPA_Rashotte_Tomato_14063	Solyc08g083240	Calmodulin-binding protein family-like (AHRD V1 **-* Q6YXT2_ORYSJ)%3B contains Interpro domain(s) IPR000048 IQ calmodulin-binding region	-3.5014
BPA_Rashotte_Tomato_21932	#N/A	#N/A	-5.65675	BPA_Rashotte_Tomato_27751	#N/A	#N/A	-3.50118
BPA_Rashotte_Tomato_14326	Solyc03g064010	Receptor like kinaseRLK	-5.61924	BPA_Rashotte_Tomato_14169	Solyc07g007120	Homeobox protein knotted-1-like 3 (AHRD V1 *-*- B6T3D1_MAIZE)%3B contains Interpro domain(s) IPR005541 KNOX2	-3.47241
BPA_Rashotte_Tomato_23732	#N/A	#N/A	-5.5869	BPA_Rashotte_Tomato_21836	#N/A	#N/A	-3.47223
BPA_Rashotte_Tomato_22453	#N/A	#N/A	-5.58272	BPA_Rashotte_Tomato_3024	Solyc10g084820	Palmitoyltransferase PFA4 (AHRD V1 ***- B6TA04_MAIZE)%3B contains Interpro domain(s) IPR001594 Zinc fingerDHHC-type	-3.45918
BPA_Rashotte_Tomato_5445	Solyc07g039570	Transcription factor (AHRD V1 *--* Q9M4A8_MAIZE)%3B contains Interpro domain(s) IPR011598 Helix-loop-helix DNA-binding	-5.57835	BPA_Rashotte_Tomato_25907	#N/A	#N/A	-3.45556
BPA_Rashotte_Tomato_23545	#N/A	#N/A	-5.57747	BPA_Rashotte_Tomato_3808	Solyc10g055720	Kinase family protein (AHRD V1 ***- D7MEZ1_ARALY)%3B contains Interpro domain(s) IPR015783 ATMRK serine/threonine protein kinase-like	-3.44948
BPA_Rashotte_Tomato_22281	Solyc07g065390	Unknown Protein (AHRD V1)	-5.54842	BPA_Rashotte_Tomato_1836	Solyc02g089720	Endo-beta-1 3-glucanase (AHRD V1 ***- B5THH0_PNECA)%3B contains Interpro domain(s) IPR005200 Glycoside hydrolasefamily 81	-3.4468
BPA_Rashotte_Tomato_28574	Solyc04g052970	Auxin-induced SAUR-like protein (AHRD V1 ***- Q8S351_CAPAN)%3B contains Interpro domain(s) IPR003676 Auxin responsive SAUR protein	-5.54278	BPA_Rashotte_Tomato_12254	Solyc06g068500	Chaperone protein DnaJ 1 (AHRD V1 *-*- D8USE3_9MICC)%3B contains Interpro domain(s) IPR001623 Heat shock protein DnaJN-terminal	-3.44192
BPA_Rashotte_Tomato_6341	Solyc05g051230	Adenylyltransferase and sulfurtransferase MOCS3 (AHRD V1 *--- MOCS3_DROGR)%3B contains Interpro domain(s) IPR009036 Molybdenum cofactor biosynthesisMoeB	-5.53873	BPA_Rashotte_Tomato_25884	Solyc01g005400	Calcium binding protein Caleosin (AHRD V1 **-* A8N0P5_COPC7)%3B contains Interpro domain(s) IPR007736 Caleosin related	-3.41253
BPA_Rashotte_Tomato_20010	#N/A	#N/A	-5.53574	BPA_Rashotte_Tomato_12568	Solyc05g041200	4-hydroxyphenylpyruvate dioxygenase (AHRD V1 **** B7X935_HEVBR)%3B contains Interpro domain(s) IPR005956 4-hydroxyphenylpyruvate dioxygenase	-3.40986
BPA_Rashotte_Tomato_25979	#N/A	#N/A	-5.52542	BPA_Rashotte_Tomato_11730	Solyc04g064880	Pathogenesis-related protein-like protein (AHRD V1 ***- Q8L9B0_ARATH)	-3.40261
BPA_Rashotte_Tomato_12773	Solyc03g059030	CDK5 regulatory subunit associated protein 3 (AHRD V1 ***- Q6IQA6_DANRE)%3B contains Interpro domain(s) IPR008491 Protein of unknown function DUF773	-5.52498	BPA_Rashotte_Tomato_18594	Solyc03g121540	Beta-galactosidase (AHRD V1 ***- Q9ZP11_SOLLC)%3B contains Interpro domain(s) IPR019801 Glycoside hydrolasefamily 35conserved site IPR001944 Glycoside hydrolasefamily 35 IPR000922 D-galactoside/L-rhamnose binding SUEL lectin	-3.3792
BPA_Rashotte_Tomato_13397	Solyc01g094340	Acetyl-coenzyme A carboxylase carboxyl transferase subunit alpha (AHRD V1 *-*- A0YRC5_LYNSP)%3B contains Interpro domain(s) IPR001095 Acetyl-CoA carboxylasealpha subunit	-5.52051	BPA_Rashotte_Tomato_20111	Solyc03g123760	Phytoene desaturase	-3.36782
BPA_Rashotte_Tomato_15881	#N/A	#N/A	-5.47797	BPA_Rashotte_Tomato_10670	Solyc07g006710	Pathogenesis-related protein PR-1 (AHRD V1 **-- B6UG61_MAIZE)%3B contains Interpro domain(s) IPR002413 Ves allergen	-3.36317
BPA_Rashotte_Tomato_921	Solyc08g013760	F-box family protein (AHRD V1 ***- B9GFH4_POPTR)%3B contains Interpro domain(s) IPR001810 Cyclin-like F-box	-5.47301	BPA_Rashotte_Tomato_10216	Solyc01g079550	Multidrug resistance protein ABC transporter family protein (AHRD V1 ***- B9GSR7_POPTR)	-3.34408
BPA_Rashotte_Tomato_426	Solyc12g014210	RNA binding protein (AHRD V1 **-* B6TJJ4_MAIZE)%3B contains Interpro domain(s) IPR000504 RNA recognition motifRNP-1	-5.45802	BPA_Rashotte_Tomato_16125	Solyc09g007010	Pathogenesis related protein PR-1 (AHRD V1 **-- Q9SC15_SOLTU)%3B contains Interpro domain(s) IPR002413 Ves allergen	-3.34317
BPA_Rashotte_Tomato_7665	Solyc08g081180	Signal peptide peptidase (AHRD V1 **** Q9MA44_ARATH)%3B contains Interpro domain(s) IPR007369 Peptidase A22Bsignal peptide peptidase	-5.45761	BPA_Rashotte_Tomato_9331	Solyc09g008430	CHY zinc finger family protein expressed (AHRD V1 ***- Q10RT9_ORYSJ)%3B contains Interpro domain(s) IPR008913 Zinc fingerCHY-type	-3.33765
BPA_Rashotte_Tomato_21610	#N/A	#N/A	-5.45259	BPA_Rashotte_Tomato_19818	Solyc10g052530	Auxin-responsive protein (AHRD V1 ***- A8IXW9_BRACM)%3B contains Interpro domain(s) IPR003676 Auxin responsive SAUR protein	-3.33589
BPA_Rashotte_Tomato_24663	#N/A	#N/A	-5.45071	BPA_Rashotte_Tomato_20716	Solyc04g054340	Unknown Protein (AHRD V1)	-3.33345
BPA_Rashotte_Tomato_27924	#N/A	#N/A	-5.44768	BPA_Rashotte_Tomato_6399	Solyc09g082460	Homocysteine s-methyltransferase (AHRD V1 **** B9HUS6_POPTR)%3B contains Interpro domain(s) IPR003726 Homocysteine S-methyltransferase	-3.32957
BPA_Rashotte_Tomato_25215	#N/A	#N/A	-5.44408	BPA_Rashotte_Tomato_17528	Solyc01g103970	RING finger protein 170 (AHRD V1 ***- C1BQ68_9MAXI)%3B contains Interpro domain(s) IPR018957 Zinc fingerC3HC4 RING-type	-3.32842
BPA_Rashotte_Tomato_25218	#N/A	#N/A	-5.43438	BPA_Rashotte_Tomato_26211	#N/A	#N/A	-3.32812
BPA_Rashotte_Tomato_26891	Solyc01g008410	LRR receptor-like serine/threonine-protein kinaseRLP	-5.43152	BPA_Rashotte_Tomato_17065	Solyc01g105360	UDP-glucuronosyltransferase (AHRD V1 **** Q5UB81_ARATH)%3B contains Interpro domain(s) IPR002213 UDP-glucuronosyl/UDP-glucosyltransferase	-3.32614
BPA_Rashotte_Tomato_25231	#N/A	#N/A	-5.43023	BPA_Rashotte_Tomato_16945	#N/A	#N/A	-3.31935
BPA_Rashotte_Tomato_22344	#N/A	#N/A	-5.42829	BPA_Rashotte_Tomato_14370	Solyc04g076460	LRR receptor-like serine/threonine-protein kinaseRLP	-3.3142
BPA_Rashotte_Tomato_20983	Solyc04g050790	Unknown Protein (AHRD V1)	-5.42595	BPA_Rashotte_Tomato_22701	#N/A	#N/A	-3.30554
BPA_Rashotte_Tomato_476	#N/A	#N/A	-5.41478	BPA_Rashotte_Tomato_27112	#N/A	#N/A	-3.29357
BPA_Rashotte_Tomato_7871	Solyc09g091860	Poly(A) RNA polymerase protein 1 (AHRD V1 *--- TRF5_ASHGO)	-5.40981	BPA_Rashotte_Tomato_22907	#N/A	#N/A	-3.2914
BPA_Rashotte_Tomato_8246	Solyc09g007370	Ribonuclease P protein subunit p29 (AHRD V1 *-*- C1BL44_OSMMO)%3B contains Interpro domain(s) IPR016848 Ribonuclease P/MRPp29 subuniteukaryotic	-5.40436	BPA_Rashotte_Tomato_26808	#N/A	#N/A	-3.28274
BPA_Rashotte_Tomato_18133	#N/A	#N/A	-5.39638	BPA_Rashotte_Tomato_25934	#N/A	#N/A	-3.26669
BPA_Rashotte_Tomato_25978	Solyc11g065340	Unknown Protein (AHRD V1)	-5.37828	BPA_Rashotte_Tomato_16274	Solyc07g008010	Myb transcription factor (AHRD V1 *--* Q6Q789_VITVI)%3B contains Interpro domain(s) IPR015495 Myb transcription factor	-3.2627
BPA_Rashotte_Tomato_18642	Solyc10g007610	Organic anion transporter (AHRD V1 **-* B6U937_MAIZE)%3B contains Interpro domain(s) IPR004853 Protein of unknown function DUF250	-5.36244	BPA_Rashotte_Tomato_9863	Solyc02g068080	Voltage-gated chloride channel (AHRD V1 **** Q96325_ARATH)%3B contains Interpro domain(s) IPR002251 Chloride channel plant CLC	-3.26041
BPA_Rashotte_Tomato_4602	Solyc04g072560	IST1 homolog (AHRD V1 *--- C1BSR8_9MAXI)%3B contains Interpro domain(s) IPR005061 Protein of unknown function DUF292eukaryotic	-5.34881	BPA_Rashotte_Tomato_22060	Solyc07g044850	WD-repeat protein-like (AHRD V1 ***- Q9FNN2_ARATH)%3B contains Interpro domain(s) IPR017986 WD40 repeatregion	-3.25723
BPA_Rashotte_Tomato_15884	#N/A	#N/A	-5.33143	BPA_Rashotte_Tomato_26050	#N/A	#N/A	-3.25137
BPA_Rashotte_Tomato_22241	Solyc05g055660	SELF PRUNING 6A	-5.32937	BPA_Rashotte_Tomato_11456	Solyc01g080010	Xylanase inhibitor (Fragment) (AHRD V1 **-- Q53IQ4_WHEAT)%3B contains Interpro domain(s) IPR001461 Peptidase A1	-3.24151
BPA_Rashotte_Tomato_23457	#N/A	#N/A	-5.312	BPA_Rashotte_Tomato_19489	Solyc06g083880	Unknown Protein (AHRD V1)	-3.23283
BPA_Rashotte_Tomato_22345	#N/A	#N/A	-5.30785	BPA_Rashotte_Tomato_18564	#N/A	#N/A	-3.2252
BPA_Rashotte_Tomato_14226	Solyc06g082810	Oligoribonuclease (AHRD V1 ***- B6U6N3_MAIZE)%3B contains Interpro domain(s) IPR006055 Exonuclease	-5.30282	BPA_Rashotte_Tomato_17685	Solyc01g006290	Peroxidase (AHRD V1 **** Q42964_TOBAC)%3B contains Interpro domain(s) IPR002016 Haem peroxidaseplant/fungal/bacterial	-3.21806
BPA_Rashotte_Tomato_2401	Solyc04g007380	Receptor serine/threonine kinase-like protein (AHRD V1 **** O49728_ARATH)%3B contains Interpro domain(s) IPR002290 Serine/threonine protein kinase	-5.2926	BPA_Rashotte_Tomato_22529	#N/A	#N/A	-3.21119
BPA_Rashotte_Tomato_27360	#N/A	#N/A	-5.28793	BPA_Rashotte_Tomato_8818	Solyc02g083630	Ascorbate peroxidase (AHRD V1 **** Q9XGS8_ZANAE)%3B contains Interpro domain(s) IPR002207 Plant ascorbate peroxidase	-3.211
BPA_Rashotte_Tomato_16808	#N/A	#N/A	-5.28456	BPA_Rashotte_Tomato_16222	#N/A	#N/A	-3.20629
BPA_Rashotte_Tomato_14241	Solyc03g005870	Eukaryotic translation initiation factor 4E (AHRD V1 ***- Q199B8_SOLLC)%3B contains Interpro domain(s) IPR001040 Eukaryotic translation initiation factor 4E (eIF-4E)	-5.28153	BPA_Rashotte_Tomato_17551	Solyc08g080630	Chymotrypsin inhibitor-2 (AHRD V1 *-*- A8V413_HORSP)%3B contains Interpro domain(s) IPR000864 Proteinase inhibitor I13potato inhibitor I	-3.19852
BPA_Rashotte_Tomato_20984	#N/A	#N/A	-5.2719	BPA_Rashotte_Tomato_17363	Solyc02g090120	Unknown Protein (AHRD V1)	-3.19701
BPA_Rashotte_Tomato_18643	#N/A	#N/A	-5.27059	BPA_Rashotte_Tomato_20328	Solyc07g049300	Endoglucanase 1 (AHRD V1 ***- B6U0J0_MAIZE)%3B contains Interpro domain(s) IPR001701 Glycoside hydrolasefamily 9	-3.1803
BPA_Rashotte_Tomato_900	Solyc01g112050	Bzip transcription factor-like (AHRD V1 *-*- Q8RU34_ORYSJ)%3B contains Interpro domain(s) IPR006867 Protein of unknown function DUF632	-5.26962	BPA_Rashotte_Tomato_19748	#N/A	#N/A	-3.17717
BPA_Rashotte_Tomato_12725	Solyc11g065520	Unknown Protein (AHRD V1)%3B contains Interpro domain(s) IPR005135 Endonuclease/exonuclease/phosphatase	-5.26689	BPA_Rashotte_Tomato_22791	Solyc06g060180	Alpha-humulene/(-)-(E)-beta-caryophyllene synthase (AHRD V1 **** HUMS_ARATH)%3B contains Interpro domain(s) IPR005630 Terpene synthasemetal-binding domain	-3.16648
BPA_Rashotte_Tomato_26390	#N/A	#N/A	-5.26037	BPA_Rashotte_Tomato_9508	Solyc09g065770	Tumor susceptibility protein 101 (Fragment) (AHRD V1 ***- Q09HB7_MACMU)%3B contains Interpro domain(s) IPR008883 Tumour susceptibility gene 101	-3.15712
BPA_Rashotte_Tomato_13392	#N/A	#N/A	-5.25597	BPA_Rashotte_Tomato_1131	Solyc12g027540	Unknown Protein (AHRD V1)	-3.15328
BPA_Rashotte_Tomato_13732	Solyc02g032950	Transcription factor WRKY (AHRD V1 ***- C7E5X8_CAPAN)%3B contains Interpro domain(s) IPR003657 DNA-binding WRKY	-5.24733	BPA_Rashotte_Tomato_4811	Solyc12g056820	Laccase (AHRD V1 ***- Q38757_ACEPS)%3B contains Interpro domain(s) IPR017761 Laccase	-3.14739
BPA_Rashotte_Tomato_26438	#N/A	#N/A	-5.2357	BPA_Rashotte_Tomato_15306	Solyc07g026650	1-aminocyclopropane-1-carboxylate oxidase (AHRD V1 **** Q6A1K7_SOLLC)%3B contains Interpro domain(s) IPR005123 Oxoglutarate and iron-dependent oxygenase	-3.1467
BPA_Rashotte_Tomato_21817	Solyc07g052790	Nbs-lrrresistance protein	-5.23563	BPA_Rashotte_Tomato_17947	#N/A	#N/A	-3.14112
BPA_Rashotte_Tomato_23260	#N/A	#N/A	-5.23055	BPA_Rashotte_Tomato_18343	Solyc07g054790	Wound induced protein (AHRD V1 ***- B6U0P9_MAIZE)	-3.13794
BPA_Rashotte_Tomato_25905	Solyc10g078330	Cyclin B-like protein (AHRD V1 ***- Q5U8T5_9SOLA)%3B contains Interpro domain(s) IPR014400 CyclinA/B/D/E	-5.22782	BPA_Rashotte_Tomato_24392	#N/A	#N/A	-3.13607
BPA_Rashotte_Tomato_12802	Solyc01g104680	GTP-binding nuclear protein Ran-A1 (AHRD V1 **-- B3TM31_ELAGV)%3B contains Interpro domain(s) IPR018210 GTP-binding nuclear proteinRanconserved site IPR002041 Ran GTPase	-5.22005	BPA_Rashotte_Tomato_20087	#N/A	#N/A	-3.13532
BPA_Rashotte_Tomato_40	#N/A	#N/A	-5.21902	BPA_Rashotte_Tomato_12179	Solyc01g057000	Universal stress protein family protein (AHRD V1 ***- D7LAT3_ARALY)%3B contains Interpro domain(s) IPR006016 UspA	-3.1342
BPA_Rashotte_Tomato_9225	#N/A	#N/A	-5.21479	BPA_Rashotte_Tomato_25071	Solyc03g097420	Receptor expression-enhancing protein 5 (AHRD V1 **-- C1C4Y8_RANCA)%3B contains Interpro domain(s) IPR004345 TB2/DP1 and HVA22 related protein	-3.12446
BPA_Rashotte_Tomato_16833	#N/A	#N/A	-5.20764	BPA_Rashotte_Tomato_9546	#N/A	#N/A	-3.12169
BPA_Rashotte_Tomato_14284	#N/A	#N/A	-5.20534	BPA_Rashotte_Tomato_12906	Solyc06g064820	GDSL esterase/lipase At1g71691 (AHRD V1 ***- GDL29_ARATH)%3B contains Interpro domain(s) IPR001087 LipaseGDSL	-3.10711
BPA_Rashotte_Tomato_16841	Solyc11g072660	Receptor protein kinase-like protein (AHRD V1 ***- Q9LJU5_ARATH)%3B contains Interpro domain(s) IPR002290 Serine/threonine protein kinase	-5.203	BPA_Rashotte_Tomato_9155	Solyc01g097570	Unknown Protein (AHRD V1)	-3.10251
BPA_Rashotte_Tomato_21818	Solyc05g013710	Cysteine desulfuration protein SufE (AHRD V1 *-*- Q2RNM6_RHORT)%3B contains Interpro domain(s) IPR003808 Fe-S metabolism associated SufE	-5.19988	BPA_Rashotte_Tomato_6122	Solyc02g092460	Speckle-type POZ protein (AHRD V1 *--- B5X432_SALSA)%3B contains Interpro domain(s) IPR000197 Zinc fingerTAZ-type	-3.10037
BPA_Rashotte_Tomato_1236	Solyc06g073110	Legume lectin beta domain (AHRD V1 *-*- A2Q3C0_MEDTR)%3B contains Interpro domain(s) IPR010341 Protein of unknown function DUF936plant	-5.19944	BPA_Rashotte_Tomato_5033	Solyc09g065650	Protein phosphatase 1L-like protein (AHRD V1 *--- D0NIG5_PHYIN)%3B contains Interpro domain(s) IPR015655 Protein phosphatase 2C	-3.09854
BPA_Rashotte_Tomato_362	Solyc04g015130	Ribosomal protein S6 kinase alpha-3 (AHRD V1 *-** KS6A3_HUMAN)%3B contains Interpro domain(s) IPR002290 Serine/threonine protein kinase	-5.19251	BPA_Rashotte_Tomato_13027	#N/A	#N/A	-3.09501
BPA_Rashotte_Tomato_11074	Solyc05g056530	DDT domain-containing protein (AHRD V1 **-- D7M1G4_ARALY)%3B contains Interpro domain(s) IPR013136 WSTF/Acf1/Cbp146	-5.19129	BPA_Rashotte_Tomato_24687	#N/A	#N/A	-3.09461
BPA_Rashotte_Tomato_18595	#N/A	#N/A	-5.18451	BPA_Rashotte_Tomato_19279	Solyc09g089610	Ethylene receptor (AHRD V1 **** Q5QG21_SOLLC)%3B contains Interpro domain(s) IPR001789 Signal transduction response regulatorreceiver region IPR014525 Signal transduction histidine kinasehybrid-typeethylene sensor IPR005467 Signal transduction histidine kinasecore	-3.08083
BPA_Rashotte_Tomato_9197	Solyc01g107310	Phosphatase 2C family protein (AHRD V1 ***- D7MFT9_ARALY)%3B contains Interpro domain(s) IPR015655 Protein phosphatase 2C	-5.18316	BPA_Rashotte_Tomato_4147	Solyc11g027840	Carboxymethylenebutenolidase homolog (AHRD V1 ***- C1BWH0_ESOLU)%3B contains Interpro domain(s) IPR002925 Dienelactone hydrolase	-3.07056
BPA_Rashotte_Tomato_24142	#N/A	#N/A	-5.16691	BPA_Rashotte_Tomato_3984	Solyc02g090470	Peroxidase (AHRD V1 ***- Q58GF4_9ROSI)%3B contains Interpro domain(s) IPR002016 Haem peroxidaseplant/fungal/bacterial	-3.06797
BPA_Rashotte_Tomato_19940	#N/A	#N/A	-5.15528	BPA_Rashotte_Tomato_26908	#N/A	#N/A	-3.06452
BPA_Rashotte_Tomato_18105	#N/A	#N/A	-5.14844	BPA_Rashotte_Tomato_24586	Solyc10g084320	Subtilisin-like protease (AHRD V1 **-- O82777_SOLLC)%3B contains Interpro domain(s) IPR015500 Peptidase S8subtilisin-related	-3.06297
BPA_Rashotte_Tomato_25220	#N/A	#N/A	-5.13991	BPA_Rashotte_Tomato_27215	#N/A	#N/A	-3.05212
BPA_Rashotte_Tomato_773	Solyc04g078130	Clathrin-coat assembly protein-like (AHRD V1 **-- Q6Z9Z3_ORYSJ)%3B contains Interpro domain(s) IPR015260 Syntaxin 6N-terminal	-5.13454	BPA_Rashotte_Tomato_18119	#N/A	#N/A	-3.04894
BPA_Rashotte_Tomato_847	Solyc12g049510	Erect panical 2 (AHRD V1 *--- B8B8K3_ORYSI)	-5.13021	BPA_Rashotte_Tomato_7139	Solyc01g108030	Methylcrotonoyl-CoA carboxylase beta subunit (AHRD V1 **** D4XQJ0_ACIHA)%3B contains Interpro domain(s) IPR000022 Carboxyl transferase	-3.04622
BPA_Rashotte_Tomato_4840	Solyc11g012400	Calcium-binding protein 39 (AHRD V1 **-* B6U5L1_MAIZE)%3B contains Interpro domain(s) IPR013878 Mo25-like	-5.12744	BPA_Rashotte_Tomato_9437	Solyc04g063380	F-box/LRR-repeat protein 2 (AHRD V1 ***- B6TAC3_MAIZE)%3B contains Interpro domain(s) IPR006553 Leucine-rich repeatcysteine-containing subtype	-3.0241
BPA_Rashotte_Tomato_485	Solyc04g076960	Sucrose transporter (AHRD V1 **** Q9FVJ6_SOLLC)%3B contains Interpro domain(s) IPR005989 Sucrose/H+ symporterplant	-5.12441	BPA_Rashotte_Tomato_10570	Solyc06g083720	Subtilisin-like protease (AHRD V1 **-- B6U0R8_MAIZE)%3B contains Interpro domain(s) IPR015500 Peptidase S8subtilisin-related	-3.02067
BPA_Rashotte_Tomato_2223	Solyc05g009760	Nbs-lrrresistance protein	-5.11434	BPA_Rashotte_Tomato_10862	Solyc12g042760	LRR receptor-like serine/threonine-protein kinaseRLP	-3.01974
BPA_Rashotte_Tomato_20981	#N/A	#N/A	-5.11409	BPA_Rashotte_Tomato_2017	Solyc12g096920	Cc-nbs-lrrresistance protein	-3.01464
BPA_Rashotte_Tomato_7690	Solyc01g066740	Transducin family protein (Fragment) (AHRD V1 *--- D7L607_ARALY)%3B contains Interpro domain(s) IPR017986 WD40 repeatregion	-5.11365	BPA_Rashotte_Tomato_21017	Solyc07g055530	Cytochrome P450	-3.00361
BPA_Rashotte_Tomato_13566	#N/A	#N/A	-5.1065	BPA_Rashotte_Tomato_11147	Solyc04g079820	Inositol 5-phosphatase 4 (AHRD V1 ***- Q8I7P3_DICDI)%3B contains Interpro domain(s) IPR000300 Inositol polyphosphate related phosphatase	-2.97905
BPA_Rashotte_Tomato_18124	#N/A	#N/A	-5.10252	BPA_Rashotte_Tomato_11520	Solyc08g007130	Beta-amylase 8 (AHRD V1 **** D7MC27_ARALY)%3B contains Interpro domain(s) IPR001554 Glycoside hydrolasefamily 14	-2.96523
BPA_Rashotte_Tomato_3897	Solyc12g100030	LRR receptor-like serine/threonine-protein kinaseRLP	-5.08289	BPA_Rashotte_Tomato_13875	Solyc10g008400	RING finger protein 5 (AHRD V1 *--- B6TI40_MAIZE)%3B contains Interpro domain(s) IPR018957 Zinc fingerC3HC4 RING-type	-2.96068
BPA_Rashotte_Tomato_1219	Solyc00g075040	Transposon Ty1-A Gag-Pol polyprotein (AHRD V1 ***- YA11B_YEAST)%3B contains Interpro domain(s) IPR013103 Reverse transcriptaseRNA-dependent DNA polymerase	-5.07617	BPA_Rashotte_Tomato_18382	Solyc07g051940	Alpha-humulene/(-)-(E)-beta-caryophyllene synthase (AHRD V1 **** HUMS_ARATH)%3B contains Interpro domain(s) IPR005630 Terpene synthasemetal-binding domain	-2.95386
BPA_Rashotte_Tomato_2082	Solyc03g119750	Family with sequence similarity 116 member B (Fragment) (AHRD V1 *--- A6X8I4_HUMAN)%3B contains Interpro domain(s) IPR012860 Protein of unknown function DUF1630	-5.06916	BPA_Rashotte_Tomato_24571	Solyc12g036330	Receptor-like protein kinase At3g21340 (AHRD V1 *-*- RLK6_ARATH)%3B contains Interpro domain(s) IPR002290 Serine/threonine protein kinase	-2.94292
BPA_Rashotte_Tomato_2514	Solyc08g083190	Hydrolase alpha/beta fold family protein expressed (AHRD V1 ***- Q8LN42_ORYSJ)%3B contains Interpro domain(s) IPR000073 Alpha/beta hydrolase fold-1	-5.05517	BPA_Rashotte_Tomato_12064	Solyc03g098730	Kunitz trypsin inhibitor (AHRD V1 ***- B8Y888_TOBAC)%3B contains Interpro domain(s) IPR011065 Kunitz inhibitor ST1-like	-2.93582
BPA_Rashotte_Tomato_1580	Solyc11g065660	Calcium-dependent protein kinase 8 (AHRD V1 ***- Q6KC54_NICPL)%3B contains Interpro domain(s) IPR002290 Serine/threonine protein kinase	-5.05288	BPA_Rashotte_Tomato_4411	Solyc09g092160	Beta-galactosidase (AHRD V1 **** A2JGW9_SOLLC)%3B contains Interpro domain(s) IPR001944 Glycoside hydrolasefamily 35	-2.93252
BPA_Rashotte_Tomato_23354	Solyc06g066500	Avr9/Cf-9 rapidly elicited protein 146 (AHRD V1 ***- Q9FQZ6_TOBAC)	-5.03041	BPA_Rashotte_Tomato_10381	Solyc08g079280	cytochrome P450	-2.92959
BPA_Rashotte_Tomato_1576	Solyc04g057970	Unknown Protein (AHRD V1)	-5.0235	BPA_Rashotte_Tomato_27605	#N/A	#N/A	-2.92064
BPA_Rashotte_Tomato_12130	Solyc03g112920	C2H2L domain class transcription factor (AHRD V1 ***- D9ZIU3_MALDO)	-5.01259	BPA_Rashotte_Tomato_10229	Solyc01g079960	Xylanase inhibitor (Fragment) (AHRD V1 **-- Q53IQ3_WHEAT)%3B contains Interpro domain(s) IPR001461 Peptidase A1	-2.92028
BPA_Rashotte_Tomato_24612	#N/A	#N/A	-4.98884	BPA_Rashotte_Tomato_9092	Solyc11g071520	Glucan endo-1 3-beta-glucosidase 7 (AHRD V1 ***- B6T478_MAIZE)%3B contains Interpro domain(s) IPR000490 Glycoside hydrolasefamily 17	-2.91889
BPA_Rashotte_Tomato_15230	#N/A	#N/A	-4.988	BPA_Rashotte_Tomato_23475	#N/A	#N/A	-2.91287
BPA_Rashotte_Tomato_13565	#N/A	#N/A	-4.9865	BPA_Rashotte_Tomato_16129	Solyc07g055950	Meiosis 5 (AHRD V1 *-*- B6T5X0_MAIZE)	-2.9106
BPA_Rashotte_Tomato_6773	#N/A	#N/A	-4.98193	BPA_Rashotte_Tomato_24103	#N/A	#N/A	-2.90879
BPA_Rashotte_Tomato_14255	#N/A	#N/A	-4.98135	BPA_Rashotte_Tomato_12612	Solyc12g056610	Short-chain dehydrogenase/reductase (AHRD V1 **-- Q6DLW2_SOLTU)%3B contains Interpro domain(s) IPR002347 Glucose/ribitol dehydrogenase	-2.90629
BPA_Rashotte_Tomato_23550	#N/A	#N/A	-4.96193	BPA_Rashotte_Tomato_9554	Solyc11g031960	GDSL esterase/lipase At1g33811 (AHRD V1 ***- GDL17_ARATH)%3B contains Interpro domain(s) IPR001087 LipaseGDSL	-2.90549
BPA_Rashotte_Tomato_22553	#N/A	#N/A	-4.93891	BPA_Rashotte_Tomato_3567	Solyc06g066680	Mitochondrial carrier protein (AHRD V1 ***- D2VIZ2_NAEGR)%3B contains Interpro domain(s) IPR002067 Mitochondrial carrier protein	-2.89838
BPA_Rashotte_Tomato_23084	Solyc06g082630	26S protease regulatory subunit 6B (AHRD V1 ***- B6TRH7_MAIZE)%3B contains Interpro domain(s) IPR005937 26S proteasome subunit P45	-4.93889	BPA_Rashotte_Tomato_6457	Solyc12g094580	Os03g0133300 protein (Fragment) (AHRD V1 *-*- Q0DVF0_ORYSJ)	-2.89235
BPA_Rashotte_Tomato_8151	Solyc09g011830	Transcription antitermination protein nusG (AHRD V1 *-*- D8IEG9_BRAP9)%3B contains Interpro domain(s) IPR006645 Transcription antitermination proteinNusGN-terminal	-4.89487	BPA_Rashotte_Tomato_22139	#N/A	#N/A	-2.87776
BPA_Rashotte_Tomato_52	Solyc01g101020	FACT complex subunit SPT16 (AHRD V1 ***- D3AWW1_POLPA)%3B contains Interpro domain(s) IPR013953 FACT complex subunit Spt16p/Cdc68p	-4.859	BPA_Rashotte_Tomato_20749	Solyc12g042960	Unknown Protein (AHRD V1)	-2.87125
BPA_Rashotte_Tomato_19490	#N/A	#N/A	-4.85728	BPA_Rashotte_Tomato_7365	Solyc03g034320	Class I glutamine amidotransferase (AHRD V1 *-*- D4V3L4_BACVU)%3B contains Interpro domain(s) IPR011697 Peptidase C26	-2.85458
BPA_Rashotte_Tomato_8247	Solyc12g006710	Tudor domain containing 3 (Fragment) (AHRD V1 *-*- B1AMN9_HUMAN)%3B contains Interpro domain(s) IPR013894 Region of unknown function DUF1767	-4.84334	BPA_Rashotte_Tomato_3892	Solyc01g087820	Subtilisin-like protease (AHRD V1 **-- O82777_SOLLC)%3B contains Interpro domain(s) IPR015500 Peptidase S8subtilisin-related IPR000209 Peptidase S8 and S53subtilisinkexinsedolisin	-2.85394
BPA_Rashotte_Tomato_20007	#N/A	#N/A	-4.84333	BPA_Rashotte_Tomato_26390	#N/A	#N/A	-2.84953
BPA_Rashotte_Tomato_25542	Solyc02g088200	Activating signal cointegrator 1 complex subunit 1 (AHRD V1 **-- C3KHG7_ANOFI)	-4.82854	BPA_Rashotte_Tomato_21680	#N/A	#N/A	-2.84828
BPA_Rashotte_Tomato_6748	Solyc02g065630	Myosin-like protein (AHRD V1 *--- Q9C717_ARATH)	-4.8159	BPA_Rashotte_Tomato_22660	Solyc01g109170	Cold acclimation protein COR413-like (AHRD V1 ***- A6YDU6_LOLTE)%3B contains Interpro domain(s) IPR008892 Cold acclimation WCOR413	-2.84554
BPA_Rashotte_Tomato_22025	#N/A	#N/A	-4.80545	BPA_Rashotte_Tomato_19036	Solyc11g042880	Harpin-induced protein (AHRD V1 **-- B6TDG9_MAIZE)	-2.83562
BPA_Rashotte_Tomato_4427	Solyc03g006280	Unknown Protein (AHRD V1)	-4.79424	BPA_Rashotte_Tomato_8897	Solyc02g080210	Pectinesterase (AHRD V1 ***- B9RXQ4_RICCO)%3B contains Interpro domain(s) IPR000070 Pectinesterasecatalytic	-2.82614
BPA_Rashotte_Tomato_11758	Solyc02g085920	Homology to unknown gene (AHRD V1 *-*- Q00YZ4_OSTTA)	-4.79365	BPA_Rashotte_Tomato_26732	#N/A	#N/A	-2.8247
BPA_Rashotte_Tomato_7005	Solyc08g079730	Mate efflux family protein (AHRD V1 **-- D7ME03_ARALY)%3B contains Interpro domain(s) IPR002528 Multi antimicrobial extrusion protein MatE	-4.79322	BPA_Rashotte_Tomato_11164	Solyc04g064610	RAG1-activating protein 1 homolog (AHRD V1 **-- R1AP1_DROPS)%3B contains Interpro domain(s) IPR018179 RAG1-activating protein 1 homologue	-2.81837
BPA_Rashotte_Tomato_16726	Solyc03g118660	Down syndrome critical region protein (AHRD V1 ***- Q17H45_AEDAE)%3B contains Interpro domain(s) IPR005377 Vacuolar protein sorting-associated protein 26	-4.77356	BPA_Rashotte_Tomato_22187	#N/A	#N/A	-2.81627
BPA_Rashotte_Tomato_23212	#N/A	#N/A	-4.76392	BPA_Rashotte_Tomato_18256	Solyc03g117810	Phosphate import ATP-binding protein pstB 1 (AHRD V1 **** B6UHM7_MAIZE)%3B contains Interpro domain(s) IPR005670 Phosphate transport system permease protein 1	-2.80375
BPA_Rashotte_Tomato_16602	#N/A	#N/A	-4.75354	BPA_Rashotte_Tomato_22685	#N/A	#N/A	-2.79022
BPA_Rashotte_Tomato_16845	Solyc07g018400	Unknown Protein (AHRD V1)	-4.74465	BPA_Rashotte_Tomato_1418	Solyc03g083420	OBP3-responsive gene 1 (AHRD V1 **-- D7MSY5_ARALY)%3B contains Interpro domain(s) IPR002290 Serine/threonine protein kinase	-2.78876
BPA_Rashotte_Tomato_24186	#N/A	#N/A	-4.73831	BPA_Rashotte_Tomato_25532	#N/A	#N/A	-2.78726
BPA_Rashotte_Tomato_24294	#N/A	#N/A	-4.72554	BPA_Rashotte_Tomato_14291	#N/A	#N/A	-2.76232
BPA_Rashotte_Tomato_12952	Solyc05g047700	Cc-nbs-lrrresistance protein	-4.7215	BPA_Rashotte_Tomato_18175	Solyc01g095240	Unknown Protein (AHRD V1)	-2.75651
BPA_Rashotte_Tomato_585	Solyc01g111890	F-box/LRR-repeat protein 14 (AHRD V1 *-*- B5X1Y2_SALSA)%3B contains Interpro domain(s) IPR001810 Cyclin-like F-box	-4.71114	BPA_Rashotte_Tomato_9046	Solyc11g007980	Cytochrome P450	-2.75647
BPA_Rashotte_Tomato_21967	Solyc09g065760	Plant-specific domain TIGR01615 family protein (AHRD V1 ***- B6SS18_MAIZE)%3B contains Interpro domain(s) IPR006502 Protein of unknown function DUF506plant	-4.70912	BPA_Rashotte_Tomato_322	Solyc01g094910	Ferric reductase oxidase (AHRD V1 **-* D6RVS5_HORVU)%3B contains Interpro domain(s) IPR013121 Ferric reductaseNAD binding	-2.75457
BPA_Rashotte_Tomato_16110	Solyc06g068470	N-methyltransferase (AHRD V1 **** D7KWM7_ARALY)	-4.7018	BPA_Rashotte_Tomato_21979	Solyc07g066580	Mercaptopyruvate sulfurtransferase-like protein (AHRD V1 **** C0LIR4_SOLLC)%3B contains Interpro domain(s) IPR001763 Rhodanese-like IPR001307 Thiosulphate sulfurtransferaseconserved site	-2.74749
BPA_Rashotte_Tomato_2056	Solyc01g091870	Major facilitator superfamily domain-containing protein 8 (AHRD V1 *--- MFSD8_XENLA)%3B contains Interpro domain(s) IPR004331 SPXN-terminal	-4.69055	BPA_Rashotte_Tomato_26090	#N/A	#N/A	-2.7448
BPA_Rashotte_Tomato_14731	Solyc03g005970	Zinc finger family protein (AHRD V1 **-- D7LUL3_ARALY)%3B contains Interpro domain(s) IPR002867 Zinc fingerC6HC-type	-4.68753	BPA_Rashotte_Tomato_24554	#N/A	#N/A	-2.74459
BPA_Rashotte_Tomato_6381	#N/A	#N/A	-4.68586	BPA_Rashotte_Tomato_17380	Solyc10g049420	Unknown Protein (AHRD V1)	-2.74211
BPA_Rashotte_Tomato_13390	#N/A	#N/A	-4.68061	BPA_Rashotte_Tomato_8714	Solyc07g017880	Peroxidase (AHRD V1 **** D4NYQ9_9ROSI)%3B contains Interpro domain(s) IPR002016 Haem peroxidaseplant/fungal/bacterial	-2.73923
BPA_Rashotte_Tomato_23741	Solyc11g013890	F-box family protein (AHRD V1 ***- B9GTQ9_POPTR)%3B contains Interpro domain(s) IPR017451 F-box associated type 1	-4.67552	BPA_Rashotte_Tomato_25925	#N/A	#N/A	-2.73716
BPA_Rashotte_Tomato_28564	Solyc12g035290	Unknown Protein (AHRD V1)	-4.66777	BPA_Rashotte_Tomato_13480	Solyc01g104260	RING finger protein 13 (AHRD V1 *-*- RNF13_CHICK)%3B contains Interpro domain(s) IPR018957 Zinc fingerC3HC4 RING-type	-2.72519
BPA_Rashotte_Tomato_668	Solyc02g091120	DNA ligase (AHRD V1 ***- B9SPY8_RICCO)%3B contains Interpro domain(s) IPR000977 ATP-dependent DNA ligase	-4.65867	BPA_Rashotte_Tomato_20125	Solyc12g096200	MYB transcription factor (AHRD V1 **-- D0VYJ9_DIOKA)%3B contains Interpro domain(s) IPR015495 Myb transcription factor	-2.72518
BPA_Rashotte_Tomato_4590	#N/A	#N/A	-4.65158	BPA_Rashotte_Tomato_5912	Solyc05g009240	Os05g0264200 protein (Fragment) (AHRD V1 *-*- Q0DJL6_ORYSJ)%3B contains Interpro domain(s) IPR006927 Protein of unknown function DUF639	-2.71398
BPA_Rashotte_Tomato_16837	Solyc01g010510	Pentatricopeptide repeat-containing protein (AHRD V1 ***- D7KPN1_ARALY)%3B contains Interpro domain(s) IPR002885 Pentatricopeptide repeat	-4.64567	BPA_Rashotte_Tomato_9348	Solyc07g009380	Xyloglucan endotransglucosylase/hydrolase 2 (AHRD V1 **** Q8GTJ0_MALDO)%3B contains Interpro domain(s) IPR016455 Xyloglucan endotransglucosylase/hydrolase IPR008263 Glycoside hydrolasefamily 16active site	-2.70352
BPA_Rashotte_Tomato_13958	Solyc01g112240	Alpha-1 3-mannosyl-glycoprotein beta-1 2-N-acetylglucosaminyltransferase (AHRD V1 **** Q9ST97_TOBAC)%3B contains Interpro domain(s) IPR004139 Glycosyl transferasefamily 13	-4.64177	BPA_Rashotte_Tomato_18335	Solyc02g080220	Pectinesterase (AHRD V1 ***- B9RXQ4_RICCO)%3B contains Interpro domain(s) IPR000070 Pectinesterasecatalytic	-2.69941
BPA_Rashotte_Tomato_22072	#N/A	#N/A	-4.62974	BPA_Rashotte_Tomato_24113	#N/A	#N/A	-2.69858
BPA_Rashotte_Tomato_16701	#N/A	#N/A	-4.62171	BPA_Rashotte_Tomato_15517	Solyc01g073780	CHP-rich zinc finger protein-like (AHRD V1 *--- Q9LTY3_ARATH)%3B contains Interpro domain(s) IPR011424 C1-like	-2.69669
BPA_Rashotte_Tomato_582	Solyc07g066230	Receptor like kinaseRLK	-4.61465	BPA_Rashotte_Tomato_12305	Solyc07g044970	ATP-binding protein (P-loop) (AHRD V1 *-*- Q81HR9_BACCR)%3B contains Interpro domain(s) IPR000623 Shikimate kinase	-2.69383
BPA_Rashotte_Tomato_7121	Solyc07g053360	Seed biotin-containing protein SBP65 (AHRD V1 *--- SBP65_PEA)%3B contains Interpro domain(s) IPR004238 Late embryogenesis abundant protein	-4.60579	BPA_Rashotte_Tomato_26155	#N/A	#N/A	-2.69055
BPA_Rashotte_Tomato_13892	#N/A	#N/A	-4.59771	BPA_Rashotte_Tomato_22043	#N/A	#N/A	-2.68955
BPA_Rashotte_Tomato_18284	#N/A	#N/A	-4.59497	BPA_Rashotte_Tomato_11715	Solyc06g035520	Acetyl esterase (AHRD V1 *--- AES_SALSV)%3B contains Interpro domain(s) IPR013094 Alpha/beta hydrolase fold-3	-2.68516
BPA_Rashotte_Tomato_1992	#N/A	#N/A	-4.58808	BPA_Rashotte_Tomato_19439	Solyc02g092410	Adenylyl-sulfate kinase (AHRD V1 **** C6TL96_SOYBN)%3B contains Interpro domain(s) IPR002891 Adenylylsulphate kinaseC-terminal	-2.67932
BPA_Rashotte_Tomato_574	Solyc02g069860	Nuclear transcription factor Y subunit A-7 (AHRD V1 ***- B6TY54_MAIZE)%3B contains Interpro domain(s) IPR001289 CCAAT-binding transcription factorsubunit B	-4.58516	BPA_Rashotte_Tomato_2770	Solyc02g081300	Sucrose synthase (AHRD V1 **** Q9FHU4_ARATH)%3B contains Interpro domain(s) IPR012820 Sucrose synthaseplants and cyanobacteria	-2.67368
BPA_Rashotte_Tomato_15790	Solyc03g122270	Inter-alpha-trypsin inhibitor domain protein (AHRD V1 ***- Q1YZ74_PHOPR)%3B contains Interpro domain(s) IPR002035 von Willebrand factortype A	-4.56772	BPA_Rashotte_Tomato_23397	Solyc01g100370	Universal stress protein (AHRD V1 ***- B6SNQ1_MAIZE)%3B contains Interpro domain(s) IPR006016 UspA	-2.67314
BPA_Rashotte_Tomato_21007	#N/A	#N/A	-4.5625	BPA_Rashotte_Tomato_15136	Solyc09g007140	17.8 kDa class I heat shock protein (AHRD V1 *--- HS178_ARATH)%3B contains Interpro domain(s) IPR008978 HSP20-like chaperone	-2.67296
BPA_Rashotte_Tomato_20669	Solyc03g006030	Receptor like kinaseRLK	-4.56148	BPA_Rashotte_Tomato_16054	#N/A	#N/A	-2.6695
BPA_Rashotte_Tomato_1098	Solyc02g077290	Glutamate-gated kainate-type ion channel receptor subunit GluR5 (AHRD V1 **** B9H2M2_POPTR)%3B contains Interpro domain(s) IPR015683 Glutamate receptor-related	-4.55132	BPA_Rashotte_Tomato_16520	Solyc08g078070	Ras-related protein Rab-1A (AHRD V1 ***- B6RB23_HALDI)%3B contains Interpro domain(s) IPR003579 Ras small GTPaseRab type	-2.66908
BPA_Rashotte_Tomato_13292	Solyc10g008100	Glucosidase 2 subunit beta (AHRD V1 *--- B5X0Z0_SALSA)	-4.54998	BPA_Rashotte_Tomato_19700	Solyc10g008980	Triose phosphate/phosphate translocator (AHRD V1 **** Q9MSB6_MESCR)%3B contains Interpro domain(s) IPR004696 Tpt phosphate/phosphoenolpyruvate translocator	-2.66098
BPA_Rashotte_Tomato_28565	#N/A	#N/A	-4.54439	BPA_Rashotte_Tomato_13494	Solyc12g006050	Nitrate transporter (AHRD V1 ***- Q8LG02_ARATH)%3B contains Interpro domain(s) IPR000109 TGF-beta receptortype I/II extracellular region	-2.66048
BPA_Rashotte_Tomato_25225	#N/A	#N/A	-4.54311	BPA_Rashotte_Tomato_23823	Solyc06g066640	Photosystem I reaction center subunit VI-1chloroplastic (AHRD V1 ***- PSAH1_ARATH)%3B contains Interpro domain(s) IPR004928 Photosystem I reaction centre subunit VI	-2.64743
BPA_Rashotte_Tomato_11960	Solyc02g080650	Copper transport protein 86 (AHRD V1 *--- B2G4S5_ZYGRO)%3B contains Interpro domain(s) IPR019156 Ataxin-10 domain	-4.53653	BPA_Rashotte_Tomato_8797	Solyc07g052370	Cytochrome P450	-2.64606
BPA_Rashotte_Tomato_399	Solyc08g015780	F-box/ankyrin repeat protein SKIP35 (AHRD V1 ***- SKI35_ARATH)%3B contains Interpro domain(s) IPR002110 Ankyrin	-4.53303	BPA_Rashotte_Tomato_14673	#N/A	#N/A	-2.6415
BPA_Rashotte_Tomato_20191	Solyc01g033980	Unknown Protein (AHRD V1)	-4.52048	BPA_Rashotte_Tomato_4336	#N/A	#N/A	-2.6325
BPA_Rashotte_Tomato_12800	Solyc04g081480	Unknown Protein (AHRD V1)	-4.51105	BPA_Rashotte_Tomato_11311	Solyc03g096640	Dehydrogenase/reductase SDR family member 4 (AHRD V1 **-* DHRS4_RABIT)%3B contains Interpro domain(s) IPR002347 Glucose/ribitol dehydrogenase	-2.62997
BPA_Rashotte_Tomato_15886	Solyc08g081130	Unknown Protein (AHRD V1)	-4.51047	BPA_Rashotte_Tomato_10907	Solyc01g109180	Long-chain-fatty-acid-CoA ligase (AHRD V1 ***- B2WS80_ARAHA)%3B contains Interpro domain(s) IPR000873 AMP-dependent synthetase and ligase	-2.62354
BPA_Rashotte_Tomato_19058	Solyc04g074130	Mitochondrial carrier protein expressed (AHRD V1 ***- Q10QM8_ORYSJ)%3B contains Interpro domain(s) IPR002067 Mitochondrial carrier protein	-4.50885	BPA_Rashotte_Tomato_25627	Solyc07g042630	Beta-Amyrin Synthase (AHRD V1 **** O82146_PANGI)%3B contains Interpro domain(s) IPR018333 Squalene cyclase	-2.62251
BPA_Rashotte_Tomato_14617	Solyc06g035710	Multidrug resistance protein mdtK (AHRD V1 *-*- MDTK_PHOLL)%3B contains Interpro domain(s) IPR002528 Multi antimicrobial extrusion protein MatE	-4.50652	BPA_Rashotte_Tomato_19143	Solyc07g006680	Hydroxycinnamoyl CoA quinate transferase (AHRD V1 **-* D6BK25_CYNSC)%3B contains Interpro domain(s) IPR003480 Transferase	-2.61928
BPA_Rashotte_Tomato_25212	#N/A	#N/A	-4.50557	BPA_Rashotte_Tomato_18681	#N/A	#N/A	-2.61161
BPA_Rashotte_Tomato_1636	Solyc02g062550	Cell division protease ftsH homolog (AHRD V1 *--- FTSH_HELPY)%3B contains Interpro domain(s) IPR003959 ATPaseAAA-typecore	-4.50172	BPA_Rashotte_Tomato_1968	Solyc03g065250	CER1 (AHRD V1 **-- B6TFH3_MAIZE)%3B contains Interpro domain(s) IPR006694 Fatty acid hydroxylase	-2.61084
BPA_Rashotte_Tomato_21481	#N/A	#N/A	-4.49094	BPA_Rashotte_Tomato_11369	#N/A	#N/A	-2.60226
BPA_Rashotte_Tomato_20006	#N/A	#N/A	-4.48985	BPA_Rashotte_Tomato_10587	Solyc06g033850	Dehydration-responsive element-binding protein 2D (AHRD V1 *-*- DRE2D_ARATH)	-2.60036
BPA_Rashotte_Tomato_16821	Solyc03g077970	Methionine aminopeptidase (AHRD V1 ***- A5ALU5_VITVI)%3B contains Interpro domain(s) IPR015706 RNA-directed DNA polymerase (reverse transcriptase)related	-4.48979	BPA_Rashotte_Tomato_11663	Solyc01g086840	Thaumatin-like protein (AHRD V1 ***- Q5DWG1_CRYJA)%3B contains Interpro domain(s) IPR001938 Thaumatinpathogenesis-related	-2.59776
BPA_Rashotte_Tomato_18914	Solyc09g098550	UBX domain-containing protein (AHRD V1 *-*- D7LJY9_ARALY)%3B contains Interpro domain(s) IPR001012 UBX	-4.48682	BPA_Rashotte_Tomato_11070	Solyc06g065060	FAD-binding domain-containing protein (AHRD V1 **-- D7MFI0_ARALY)%3B contains Interpro domain(s) IPR006094 FAD linked oxidaseN-terminal	-2.59518
BPA_Rashotte_Tomato_20091	#N/A	#N/A	-4.48292	BPA_Rashotte_Tomato_8641	Solyc05g054390	Response regulator 8 (AHRD V1 *-*- Q9AV93_MAIZE)%3B contains Interpro domain(s) IPR017053 Response regulatorplant B-type	-2.5892
BPA_Rashotte_Tomato_1685	Solyc11g069190	Auxin response factor 4 (AHRD V1 **** Q2LAI9_SOLLC)%3B contains Interpro domain(s) IPR011525 Aux/IAA-ARF-dimerisation IPR003340 Transcriptional factor B3	-4.46917	BPA_Rashotte_Tomato_12858	Solyc04g080520	Unknown Protein (AHRD V1)	-2.58872
BPA_Rashotte_Tomato_14730	Solyc09g009530	Hydrolase alpha/beta fold family protein (AHRD V1 **** D7LIQ3_ARALY)%3B contains Interpro domain(s) IPR000073 Alpha/beta hydrolase fold-1	-4.45236	BPA_Rashotte_Tomato_23287	#N/A	#N/A	-2.58615
BPA_Rashotte_Tomato_6524	Solyc01g016710	Polyprotein (Fragment) (AHRD V1 ***- Q29SA7_9VIRU)%3B contains Interpro domain(s) IPR000477 RNA-directed DNA polymerase (reverse transcriptase)	-4.44741	BPA_Rashotte_Tomato_16445	#N/A	#N/A	-2.58533
BPA_Rashotte_Tomato_21738	#N/A	#N/A	-4.44305	BPA_Rashotte_Tomato_10120	#N/A	#N/A	-2.58437
BPA_Rashotte_Tomato_11484	Solyc12g056440	Major facilitator superfamily domain-containing protein 8 (AHRD V1 *--- MFSD8_DANRE)%3B contains Interpro domain(s) IPR004331 SPXN-terminal	-4.43439	BPA_Rashotte_Tomato_22687	#N/A	#N/A	-2.57472
BPA_Rashotte_Tomato_20743	Solyc04g079030	Anthocyanidin 3-O-glucosyltransferase (AHRD V1 *-*- B6TRK5_MAIZE)%3B contains Interpro domain(s) IPR002213 UDP-glucuronosyl/UDP-glucosyltransferase	-4.43111	BPA_Rashotte_Tomato_20203	Solyc01g104900	NAC domain protein IPR003441 (AHRD V1 ***- B9GZS1_POPTR)%3B contains Interpro domain(s) IPR003441 No apical meristem (NAM) protein	-2.57422
BPA_Rashotte_Tomato_26220	#N/A	#N/A	-4.42726	BPA_Rashotte_Tomato_21452	Solyc02g081560	Unknown Protein (AHRD V1)	-2.57325
BPA_Rashotte_Tomato_559	Solyc07g049730	TO62-3 (Fragment) (AHRD V1 *-*- Q3LVL2_TAROF)%3B contains Interpro domain(s) IPR010471 Protein of unknown function DUF1068	-4.41793	BPA_Rashotte_Tomato_21688	Solyc07g044910	Unknown Protein (AHRD V1)	-2.5634
BPA_Rashotte_Tomato_16832	Solyc12g088070	TRAF type zinc finger domain containing 1 (AHRD V1 **-- B6T8M5_MAIZE)	-4.40607	BPA_Rashotte_Tomato_18099	Solyc03g005580	Legumin 11S-globulin (AHRD V1 **-- Q39770_GINBI)%3B contains Interpro domain(s) IPR014710 RmlC-like jelly roll fold	-2.56277
BPA_Rashotte_Tomato_22800	Solyc03g093180	Peroxisomal membrane protein 11-4 (AHRD V1 ***- PX114_ORYSJ)%3B contains Interpro domain(s) IPR008733 Peroxisomal biogenesis factor 11	-4.38564	BPA_Rashotte_Tomato_18394	Solyc02g077060	RPW8.2 (AHRD V1 **-- C4P0N9_ARALP)%3B contains Interpro domain(s) IPR008808 Mildew-resistancebroad-spectrum	-2.55744
BPA_Rashotte_Tomato_5440	Solyc12g027780	HAT family dimerisation domain containing protein expressed (AHRD V1 ***- Q10BC8_ORYSJ)%3B contains Interpro domain(s) IPR007021 Protein of unknown function DUF659	-4.38444	BPA_Rashotte_Tomato_14575	Solyc08g074620	Polyphenol oxidase (AHRD V1 ***- Q41428_SOLTU)%3B contains Interpro domain(s) IPR016213 Polyphenol oxidaseplant	-2.55667
BPA_Rashotte_Tomato_22190	#N/A	#N/A	-4.37918	BPA_Rashotte_Tomato_6657	Solyc06g048730	Uroporphyrinogen decarboxylase (AHRD V1 **** C6TEE8_SOYBN)%3B contains Interpro domain(s) IPR000257 Uroporphyrinogen decarboxylase (URO-D)	-2.55036
BPA_Rashotte_Tomato_8257	Solyc11g010290	2-oxoglutarate/malate translocator (AHRD V1 **-* Q9FMF7_ARATH)%3B contains Interpro domain(s) IPR001898 Sodium/sulphate symporter	-4.36347	BPA_Rashotte_Tomato_8844	Solyc06g064510	O-methyltransferase (AHRD V1 ***- A5HJZ9_VITVI)%3B contains Interpro domain(s) IPR016461 O-methyltransferaseCOMTeukaryota	-2.54623
BPA_Rashotte_Tomato_15210	Solyc02g094060	Voltage-gated chloride channel (AHRD V1 **** Q96325_ARATH)%3B contains Interpro domain(s) IPR002251 Chloride channel plant CLC	-4.36221	BPA_Rashotte_Tomato_11040	Solyc01g088150	Glycerol-3-phosphate dehydrogenase-like protein (AHRD V1 **** Q8S2G5_ORYSJ)%3B contains Interpro domain(s) IPR006168 NAD-dependent glycerol-3-phosphate dehydrogenase	-2.54045
BPA_Rashotte_Tomato_16321	#N/A	#N/A	-4.3584	BPA_Rashotte_Tomato_27893	Solyc05g046290	Xyloglucan endotransglucosylase/hydrolase 2 (AHRD V1 **** Q8GTJ0_MALDO)%3B contains Interpro domain(s) IPR016455 Xyloglucan endotransglucosylase/hydrolase	-2.53844
BPA_Rashotte_Tomato_649	Solyc12g088940	Protein serine/threonine kinase (AHRD V1 *-*- D3BP85_POLPA)%3B contains Interpro domain(s) IPR002290 Serine/threonine protein kinase	-4.3506	BPA_Rashotte_Tomato_16833	#N/A	#N/A	-2.53457
BPA_Rashotte_Tomato_20522	#N/A	#N/A	-4.34955	BPA_Rashotte_Tomato_19065	Solyc06g008300	LRR receptor-like serine/threonine-protein kinaseRLP	-2.52675
BPA_Rashotte_Tomato_14666	Solyc12g077370	CBL-interacting protein kinase 6 (AHRD V1 ***- A0MNL4_POPTR)%3B contains Interpro domain(s) IPR004041 NAF	-4.34895	BPA_Rashotte_Tomato_13231	#N/A	#N/A	-2.51891
BPA_Rashotte_Tomato_1578	Solyc01g009280	Serine/threonine-protein phosphatase (AHRD V1 **** D7LGU6_ARALY)%3B contains Interpro domain(s) IPR012391 Serine/threonine protein phosphataseBSU1	-4.34129	BPA_Rashotte_Tomato_19055	Solyc11g069180	Isovaleryl-CoA dehydrogenase (AHRD V1 ***- Q0MX57_BETVU)%3B contains Interpro domain(s) IPR009100 Acyl-CoA dehydrogenase/oxidasemiddle and N-terminal	-2.50967
BPA_Rashotte_Tomato_11210	Solyc10g007070	CT099 (Fragment) (AHRD V1 *--- Q30GY4_9SOLN)%3B contains Interpro domain(s) IPR003245 Plastocyanin-like	-4.33978	BPA_Rashotte_Tomato_18453	Solyc06g076400	Protein phosphatase 2C (AHRD V1 **** Q8RVG0_TOBAC)%3B contains Interpro domain(s) IPR015655 Protein phosphatase 2C	-2.50723
BPA_Rashotte_Tomato_4421	Solyc09g018160	Os12g0114200 protein (Fragment) (AHRD V1 *--- Q0IQL4_ORYSJ)	-4.33774	BPA_Rashotte_Tomato_21584	#N/A	#N/A	-2.50524
BPA_Rashotte_Tomato_21981	#N/A	#N/A	-4.32093	BPA_Rashotte_Tomato_21867	Solyc08g078410	Ethylene-responsive transcription factor 1 (AHRD V1 *-*- ERF1_ORYSJ)%3B contains Interpro domain(s) IPR001471 Pathogenesis-related transcriptional factor and ERFDNA-binding	-2.50161
BPA_Rashotte_Tomato_25171	#N/A	#N/A	-4.31904	BPA_Rashotte_Tomato_16173	#N/A	#N/A	-2.49777
BPA_Rashotte_Tomato_11166	Solyc04g026230	Kinase like protein (AHRD V1 ***- O23334_ARATH)%3B contains Interpro domain(s) IPR015783 ATMRK serine/threonine protein kinase-like	-4.3188
BPA_Rashotte_Tomato_4050	Solyc06g069130	Kinesin-like protein 73641-79546 (AHRD V1 ***- Q9CAC9_ARATH)%3B contains Interpro domain(s) IPR001752 Kinesinmotor region	-4.31816
BPA_Rashotte_Tomato_12469	#N/A	#N/A	-4.30437
BPA_Rashotte_Tomato_16846	#N/A	#N/A	-4.30341
BPA_Rashotte_Tomato_16830	#N/A	#N/A	-4.30147
BPA_Rashotte_Tomato_27361	#N/A	#N/A	-4.3007
BPA_Rashotte_Tomato_1200	#N/A	#N/A	-4.29678
BPA_Rashotte_Tomato_6946	Solyc10g078540	H/ACA ribonucleoprotein complex subunit 1-like protein 1 (AHRD V1 *-*- B6TYV7_MAIZE)%3B contains Interpro domain(s) IPR007504 Gar1 protein RNA-binding region	-4.29177
BPA_Rashotte_Tomato_23414	#N/A	#N/A	-4.28759
BPA_Rashotte_Tomato_14227	Solyc11g073090	Os07g0175100 protein (Fragment) (AHRD V1 ***- Q0D898_ORYSJ)	-4.28725
BPA_Rashotte_Tomato_13902	#N/A	#N/A	-4.2862
BPA_Rashotte_Tomato_10780	Solyc04g015070	C2 domain containing protein (AHRD V1 **-- Q2A9R2_BRAOL)%3B contains Interpro domain(s) IPR018029 C2 membrane targeting protein	-4.28474
BPA_Rashotte_Tomato_16823	Solyc02g086360	Octicosapeptide/Phox/Bem1p domain-containing protein (AHRD V1 *--- D7L8F8_ARALY)%3B contains Interpro domain(s) IPR000270 Octicosapeptide/Phox/Bem1p	-4.28384
BPA_Rashotte_Tomato_6944	Solyc10g085400	D-alanine--D-alanine ligase family (AHRD V1 ***- D7L782_ARALY)%3B contains Interpro domain(s) IPR013817 Pre-ATP-grasp fold	-4.28047
BPA_Rashotte_Tomato_13890	Solyc02g080360	Unknown Protein (AHRD V1)	-4.26907
BPA_Rashotte_Tomato_18712	#N/A	#N/A	-4.26396
BPA_Rashotte_Tomato_18138	Solyc03g117580	Os08g0272000 protein (Fragment) (AHRD V1 ***- Q0J6S6_ORYSJ)	-4.26002
BPA_Rashotte_Tomato_19491	Solyc03g114740	BSD domain containing protein (AHRD V1 ***- B4FWY5_MAIZE)%3B contains Interpro domain(s) IPR005607 BSD	-4.25847
BPA_Rashotte_Tomato_1181	Solyc07g066340	UPF0431 protein C1orf66 homolog (AHRD V1 **-- CA066_RAT)	-4.252
BPA_Rashotte_Tomato_2157	Solyc01g007150	Coatomer subunit beta-1 (AHRD V1 ***- D7MB61_ARALY)%3B contains Interpro domain(s) IPR016460 Coatomerbeta subunit	-4.24867
BPA_Rashotte_Tomato_25909	Solyc09g066430	60S ribosomal protein L14 (AHRD V1 ***- D7MEJ2_ARALY)%3B contains Interpro domain(s) IPR002784 Ribosomal protein L14	-4.24479
BPA_Rashotte_Tomato_2394	Solyc02g067080	UDP-D-glucose dehydrogenase (AHRD V1 ***- D2WK25_GOSHI)%3B contains Interpro domain(s) IPR014028 UDP-glucose/GDP-mannose dehydrogenasedimerisation and substrate-binding	-4.22642
BPA_Rashotte_Tomato_11605	#N/A	#N/A	-4.22141
BPA_Rashotte_Tomato_27000	Solyc08g014450	Kinase family protein (AHRD V1 ***- D7KBF8_ARALY)%3B contains Interpro domain(s) IPR016253 Integrin-linked protein kinase	-4.21937
BPA_Rashotte_Tomato_16819	#N/A	#N/A	-4.19296
BPA_Rashotte_Tomato_10785	#N/A	#N/A	-4.19219
BPA_Rashotte_Tomato_710	Solyc03g112760	Unknown Protein (AHRD V1)	-4.18075
BPA_Rashotte_Tomato_6020	Solyc01g009690	LRR receptor-like serine/threonine-protein kinaseRLP	-4.17896
BPA_Rashotte_Tomato_8244	#N/A	#N/A	-4.1726
BPA_Rashotte_Tomato_11644	Solyc09g009540	Hydrolase alpha/beta fold family protein (AHRD V1 **** D7LIQ3_ARALY)%3B contains Interpro domain(s) IPR000073 Alpha/beta hydrolase fold-1	-4.16782
BPA_Rashotte_Tomato_18141	#N/A	#N/A	-4.15841
BPA_Rashotte_Tomato_16849	Solyc12g011090	Unknown Protein (AHRD V1)	-4.15758
BPA_Rashotte_Tomato_21012	#N/A	#N/A	-4.15009
BPA_Rashotte_Tomato_17481	#N/A	#N/A	-4.1483
BPA_Rashotte_Tomato_2882	Solyc01g110540	Unknown Protein (AHRD V1)	-4.14513
BPA_Rashotte_Tomato_6081	Solyc03g071560	RNA-binding protein-like (AHRD V1 *-** Q8RWN5_ARATH)%3B contains Interpro domain(s) IPR015465 RNA recognition motifglycine rich protein	-4.14428
BPA_Rashotte_Tomato_2881	Solyc11g005920	NAC domain protein IPR003441 (AHRD V1 *-*- B9HEK0_POPTR)%3B contains Interpro domain(s) IPR003441 No apical meristem (NAM) protein	-4.14118
BPA_Rashotte_Tomato_12861	#N/A	#N/A	-4.13705
BPA_Rashotte_Tomato_4936	Solyc08g074640	Polyphenol oxidase (AHRD V1 ***- Q41428_SOLTU)%3B contains Interpro domain(s) IPR002227 Tyrosinase	-4.13269
BPA_Rashotte_Tomato_1221	Solyc09g005910	Mg2+-dependent phosphatidate (PA) phosphatase catalyzes the dephosphorylation of PA to yield diacylglycerol and Pi responsible for de novo lipid synthesis homologous to mammalian lipin 1 (AHRD V1 *--* D6VZY7_YEAST)%3B contains Interpro domain(s) IPR013209 LNS2Lipin/Ned1/Smp2	-4.13214
BPA_Rashotte_Tomato_18285	#N/A	#N/A	-4.12032
BPA_Rashotte_Tomato_15882	Solyc06g011570	Haloacid dehalogenase-like hydrolase-like (AHRD V1 ***- Q5JNL2_ORYSJ)%3B contains Interpro domain(s) IPR002036 Uncharacterised protein family UPF0054	-4.10387
BPA_Rashotte_Tomato_8793	Solyc05g015610	Histidine kinase cytokinin receptor (AHRD V1 **** B9GZP2_POPTR)%3B contains Interpro domain(s) IPR006189 CHASE	-4.10213
BPA_Rashotte_Tomato_558	Solyc01g112250	Calcium-dependent protein kinase 3 (AHRD V1 **** Q7Y050_CAPAN)%3B contains Interpro domain(s) IPR002290 Serine/threonine protein kinase	-4.09623
BPA_Rashotte_Tomato_19616	Solyc04g072380	Phosphatidylinositol 3%2C4%2C5-trisphosphate-dependent Rac exchanger 2 protein (AHRD V1 *--- PREX2_MOUSE)%3B contains Interpro domain(s) IPR006869 Protein of unknown function DUF547	-4.09292
BPA_Rashotte_Tomato_154	Solyc02g027080	Cc-nbs-lrrresistance protein	-4.09096
BPA_Rashotte_Tomato_16853	Solyc11g010430	Ovarian cancer-associated gene 2 protein homolog (AHRD V1 **-- C1BZZ2_9MAXI)%3B contains Interpro domain(s) IPR005645 Protein of unknown function DUF341	-4.08989
BPA_Rashotte_Tomato_1413	Solyc06g065730	Chromodomain helicase DNA binding protein 3 (AHRD V1 **-* B1AR17_MOUSE)%3B contains Interpro domain(s) IPR000330 SNF2-related	-4.08926
BPA_Rashotte_Tomato_26971	#N/A	#N/A	-4.08832
BPA_Rashotte_Tomato_16810	#N/A	#N/A	-4.08336
BPA_Rashotte_Tomato_21566	#N/A	#N/A	-4.082
BPA_Rashotte_Tomato_16811	Solyc01g106340	Glutamyl-tRNA(Gln) amidotransferase subunit A (AHRD V1 ***- C5FFK2_NANOT)%3B contains Interpro domain(s) IPR000120 Amidase signature enzyme	-4.0804
BPA_Rashotte_Tomato_15911	Solyc02g077260	Calmodulin binding protein (AHRD V1 **-* B6TIB2_MAIZE)%3B contains Interpro domain(s) IPR000048 IQ calmodulin-binding region	-4.07487
BPA_Rashotte_Tomato_1893	Solyc05g011920	ACT domain-containing protein (AHRD V1 **-- D7M3X3_ARALY)%3B contains Interpro domain(s) IPR002912 Amino acid-binding ACT	-4.06168
BPA_Rashotte_Tomato_19442	Solyc03g115810	Vacuolar fusion protein mon1 (AHRD V1 ***- C5JTA2_AJEDS)%3B contains Interpro domain(s) IPR004353 Vacuolar fusion protein MON1	-4.06069
BPA_Rashotte_Tomato_16840	#N/A	#N/A	-4.0567
BPA_Rashotte_Tomato_1131	Solyc12g027540	Unknown Protein (AHRD V1)	-4.03802
BPA_Rashotte_Tomato_19168	Solyc12g010120	Reticulon-like protein B21 (AHRD V1 *-*- RTNLS_ARATH)%3B contains Interpro domain(s) IPR003388 Reticulon	-4.03303
BPA_Rashotte_Tomato_2786	Solyc11g008520	Ribonuclease 3-like protein 3 (AHRD V1 *-*- RTL3_ORYSJ)%3B contains Interpro domain(s) IPR000999 Ribonuclease III	-4.032
BPA_Rashotte_Tomato_18791	Solyc06g005170	Mitogen-activated protein kinase 3 (AHRD V1 **** Q84MI4_SOLLC)%3B contains Interpro domain(s) IPR002290 Serine/threonine protein kinase	-4.03031
BPA_Rashotte_Tomato_21930	Solyc01g096390	DNA-directed RNA polymerase (AHRD V1 ***- D7LEE8_ARALY)%3B contains Interpro domain(s) IPR006592 RNA polymeraseN-terminal	-4.02723
BPA_Rashotte_Tomato_6150	Solyc09g015770	WRKY transcription factor 6 (AHRD V1 **** A7UGD3_SOLTU)%3B contains Interpro domain(s) IPR003657 DNA-binding WRKY	-4.02557
BPA_Rashotte_Tomato_21117	Solyc03g113020	Vacuolar protein sorting 29 (AHRD V1 ***- B6SUM0_MAIZE)%3B contains Interpro domain(s) IPR000979 Uncharacterised protein family UPF0025	-4.01941
BPA_Rashotte_Tomato_13381	Solyc03g062850	Transposon Ty1-PL Gag-Pol polyprotein (AHRD V1 ***- YP11B_YEAST)%3B contains Interpro domain(s) IPR013103 Reverse transcriptaseRNA-dependent DNA polymerase	-3.99783
BPA_Rashotte_Tomato_4424	Solyc01g007880	MORN repeat protein (AHRD V1 *--- D4V7H0_BACVU)%3B contains Interpro domain(s) IPR019746 Tubulin/FtsZN-terminal	-3.9947
BPA_Rashotte_Tomato_21702	#N/A	#N/A	-3.98939
BPA_Rashotte_Tomato_16516	#N/A	#N/A	-3.98853
BPA_Rashotte_Tomato_22604	#N/A	#N/A	-3.98666
BPA_Rashotte_Tomato_1015	Solyc12g088880	Epimerase/dehydratase (AHRD V1 ***- C7JBC7_ACEP3)%3B contains Interpro domain(s) IPR016040 NAD(P)-binding domain	-3.98514
BPA_Rashotte_Tomato_9084	Solyc12g089340	Vacuolar protein sorting 35 (AHRD V1 ***- B6U2K5_MAIZE)%3B contains Interpro domain(s) IPR005378 Vacuolar protein sorting-associated protein 35	-3.98337
BPA_Rashotte_Tomato_21740	Solyc06g005790	DNA-directed RNA polymerase II subunit (AHRD V1 **** A8N5F1_COPC7)%3B contains Interpro domain(s) IPR003029 Ribosomal protein S1RNA binding domain	-3.97814
BPA_Rashotte_Tomato_16092	Solyc09g082240	Ribosomal-protein-alanine N-acetyltransferase (AHRD V1 *-** D3FS71_BACPE)%3B contains Interpro domain(s) IPR000182 GCN5-related N-acetyltransferase	-3.97425
BPA_Rashotte_Tomato_24241	#N/A	#N/A	-3.97252
BPA_Rashotte_Tomato_714	Solyc05g013490	Unknown Protein (AHRD V1)	-3.96923
BPA_Rashotte_Tomato_16839	#N/A	#N/A	-3.968
BPA_Rashotte_Tomato_21969	Solyc01g016950	Transposon Ty1-PL Gag-Pol polyprotein (AHRD V1 ***- YP11B_YEAST)%3B contains Interpro domain(s) IPR001584 Integrasecatalytic core	-3.96548
BPA_Rashotte_Tomato_18283	Solyc11g006550	Uricase (AHRD V1 ***- A2SXR3_SOLLC)%3B contains Interpro domain(s) IPR002042 Uricase	-3.96544
BPA_Rashotte_Tomato_7437	Solyc08g015710	F-box family protein (AHRD V1 ***- B9GFH4_POPTR)%3B contains Interpro domain(s) IPR001810 Cyclin-like F-box	-3.95956
BPA_Rashotte_Tomato_1301	Solyc02g091080	Multidrug resistance protein mdtK (AHRD V1 *-*- MDTK_SHIF8)%3B contains Interpro domain(s) IPR015521 MATE family transporter related protein	-3.95548
BPA_Rashotte_Tomato_18145	Solyc10g085960	Pathogenesis-related protein (AHRD V1 *--- B3TLW3_ELAGV)%3B contains Interpro domain(s) IPR001283 Allergen V5/Tpx-1 related	-3.95203
BPA_Rashotte_Tomato_2013	Solyc02g078210	Ubiquitin-conjugating enzyme 22 (AHRD V1 ***- D7L888_ARALY)%3B contains Interpro domain(s) IPR000608 Ubiquitin-conjugating enzymeE2	-3.94422
BPA_Rashotte_Tomato_10356	Solyc12g044880	Beta-galactosidase (AHRD V1 ***- Q546T5_SOLLC)%3B contains Interpro domain(s) IPR001944 Glycoside hydrolasefamily 35	-3.94379
BPA_Rashotte_Tomato_7003	Solyc03g083240	Transcription factor jumonji domain-containing protein (AHRD V1 **-* D7M504_ARALY)%3B contains Interpro domain(s) IPR013129 Transcription factor jumonji	-3.93477
BPA_Rashotte_Tomato_9256	Solyc07g007630	Actin-related protein 2/3 complex subunit 3 (AHRD V1 **** B6U3I7_MAIZE)%3B contains Interpro domain(s) IPR007204 ARP2/3 complexp21-Arc subunit	-3.93386
BPA_Rashotte_Tomato_11168	Solyc06g008300	LRR receptor-like serine/threonine-protein kinaseRLP	-3.92751
BPA_Rashotte_Tomato_13321	Solyc12g049030	Fatty acid desaturase (AHRD V1 ***- B3SP99_CAPAN)%3B contains Interpro domain(s) IPR005804 Fatty acid desaturasetype 1	-3.92352
BPA_Rashotte_Tomato_1902	Solyc05g013440	Primary amine oxidase (AHRD V1 **** B4WL51_9SYNE)%3B contains Interpro domain(s) IPR000269 Copper amine oxidase	-3.92083
BPA_Rashotte_Tomato_28573	Solyc09g056150	Transposon Ty1-H Gag-Pol polyprotein (AHRD V1 *-*- YH11B_YEAST)%3B contains Interpro domain(s) IPR001584 Integrasecatalytic core	-3.91567
BPA_Rashotte_Tomato_25602	#N/A	#N/A	-3.89298
BPA_Rashotte_Tomato_4371	Solyc06g034330	E3 ubiquitin ligase (AHRD V1 *--* Q2URX1_ASPOR)%3B contains Interpro domain(s) IPR018957 Zinc fingerC3HC4 RING-type	-3.88989
BPA_Rashotte_Tomato_1819	Solyc10g084740	rRNA-processing protein utp23 (AHRD V1 *--- UTP23_SCHPO)%3B contains Interpro domain(s) IPR006984 Protein of unknown function DUF652	-3.88739
BPA_Rashotte_Tomato_6600	Solyc06g060510	Transcription elongation factor SPT5 (AHRD V1 *--- SPT5H_DANRE)%3B contains Interpro domain(s) IPR010605 Protein of unknown function DUF1191	-3.86829
BPA_Rashotte_Tomato_16013	#N/A	#N/A	-3.86006
BPA_Rashotte_Tomato_28571	Solyc02g078300	Transcription initiation factor TFIID subunit (AHRD V1 ***- D3BV86_POLPA)%3B contains Interpro domain(s) IPR003195 Transcription initiation factor IID18 kDa subunit	-3.85968
BPA_Rashotte_Tomato_116	#N/A	#N/A	-3.8594
BPA_Rashotte_Tomato_21947	#N/A	#N/A	-3.85737
BPA_Rashotte_Tomato_13567	#N/A	#N/A	-3.85502
BPA_Rashotte_Tomato_18139	#N/A	#N/A	-3.85387
BPA_Rashotte_Tomato_21682	Solyc01g081480	Genomic DNA chromosome 5 P1 clone MVA3 (AHRD V1 **-- Q9FN84_ARATH)	-3.84573
BPA_Rashotte_Tomato_120	Solyc09g064630	TPR domain protein (AHRD V1 *--- B6U810_MAIZE)%3B contains Interpro domain(s) IPR011990 Tetratricopeptide-like helical	-3.8446
BPA_Rashotte_Tomato_1421	#N/A	#N/A	-3.84224
BPA_Rashotte_Tomato_11029	Solyc10g055480	Unknown Protein (AHRD V1)	-3.83907
BPA_Rashotte_Tomato_134	Solyc02g089500	Tomato CONSTANS-like 2	-3.83252
BPA_Rashotte_Tomato_3355	Solyc02g082050	Tir-nbs-lrrresistance protein	-3.83148
BPA_Rashotte_Tomato_1843	Solyc02g069580	UDP-glucose 4-epimerase (AHRD V1 **** B1XPB1_SYNP2)%3B contains Interpro domain(s) IPR005886 UDP-glucose 4-epimerase	-3.8297
BPA_Rashotte_Tomato_1455	Solyc02g079590	Serine/threonine kinase receptor (AHRD V1 **** Q7DMS5_BRANA)%3B contains Interpro domain(s) IPR002290 Serine/threonine protein kinase	-3.82867
BPA_Rashotte_Tomato_12573	#N/A	#N/A	-3.80986
BPA_Rashotte_Tomato_6754	Solyc02g088910	Ninja-family protein 3 (AHRD V1 ***- NNJA3_WHEAT)%3B contains Interpro domain(s) IPR012463 Protein of unknown function DUF1675	-3.78126
BPA_Rashotte_Tomato_1158	Solyc11g069780	2-phosphoglycerate kinase (AHRD V1 *-*- D9PV08_METTM)	-3.77896
BPA_Rashotte_Tomato_28082	#N/A	#N/A	-3.7738
BPA_Rashotte_Tomato_19181	Solyc01g094780	Unknown Protein (AHRD V1)	-3.77063
BPA_Rashotte_Tomato_1358	Solyc02g079020	AP2 domain-containing transcription factor (AHRD V1 *--* B9HWL7_POPTR)%3B contains Interpro domain(s) IPR003340 Transcriptional factor B3	-3.7654
BPA_Rashotte_Tomato_102	Solyc07g007890	CCR4-NOT transcription complex subunit 10 (AHRD V1 *-*- Q28FZ8_XENTR)%3B contains Interpro domain(s) IPR011990 Tetratricopeptide-like helical	-3.76382
BPA_Rashotte_Tomato_16113	#N/A	#N/A	-3.75641
BPA_Rashotte_Tomato_3479	Solyc02g065080	bisphosphoglycerate-dependent phosphoglycerate mutase (AHRD V1 *-*- GPMA_METS4)%3B contains Interpro domain(s) IPR013078 Phosphoglycerate mutase	-3.7545
BPA_Rashotte_Tomato_19182	#N/A	#N/A	-3.7501
BPA_Rashotte_Tomato_21935	Solyc08g069010	Pentatricopeptide repeat-containing protein (AHRD V1 ***- D7M2Z4_ARALY)%3B contains Interpro domain(s) IPR002885 Pentatricopeptide repeat	-3.74732
BPA_Rashotte_Tomato_59	Solyc04g015440	Pentatricopeptide repeat-containing protein (AHRD V1 ***- D7L610_ARALY)%3B contains Interpro domain(s) IPR002885 Pentatricopeptide repeat	-3.7346
BPA_Rashotte_Tomato_23583	Solyc01g080270	Alpha/beta hydrolase (AHRD V1 *--- C4IIG9_CLOBU)%3B contains Interpro domain(s) IPR000073 Alpha/beta hydrolase fold-1	-3.72243
BPA_Rashotte_Tomato_11961	Solyc02g067860	Aldose 1-epimerase family protein (AHRD V1 **** D7M6K2_ARALY)%3B contains Interpro domain(s) IPR014718 Glycoside hydrolase-type carbohydrate-bindingsubgroup	-3.71485
BPA_Rashotte_Tomato_12	Solyc05g052490	Ectonucleoside triphosphate diphosphohydrolase 1 (AHRD V1 *--- Q6DC46_DANRE)%3B contains Interpro domain(s) IPR000407 Nucleoside phosphatase GDA1/CD39	-3.71046
BPA_Rashotte_Tomato_2522	Solyc10g081440	NADH cytochrome b5 reductase (AHRD V1 ***- Q5PY86_VERFO)%3B contains Interpro domain(s) IPR008333 Oxidoreductase FAD-binding region	-3.70388
BPA_Rashotte_Tomato_520	Solyc02g092910	Chromatin modification-related protein EAF3 (AHRD V1 **-- B6TDE5_MAIZE)%3B contains Interpro domain(s) IPR017398 Histone H4 acetyltransferaseNuA4 complexEaf3/MRG15 subunit	-3.70191
BPA_Rashotte_Tomato_6758	Solyc12g009540	Transposon Ty1-A Gag-Pol polyprotein (AHRD V1 ***- YA11B_YEAST)%3B contains Interpro domain(s) IPR013103 Reverse transcriptaseRNA-dependent DNA polymerase	-3.69606
BPA_Rashotte_Tomato_653	#N/A	#N/A	-3.69301
BPA_Rashotte_Tomato_11702	Solyc08g008220	Ubiquitin-conjugating enzyme E2 10 (AHRD V1 ***- UBC10_ARATH)%3B contains Interpro domain(s) IPR000608 Ubiquitin-conjugating enzymeE2	-3.69114
BPA_Rashotte_Tomato_11350	Solyc08g066350	Histidine phosphotransfer protein (AHRD V1 **** B9HE19_POPTR)%3B contains Interpro domain(s) IPR008207 Signal transduction histidine kinasephosphotransfer (Hpt) region	-3.67512
BPA_Rashotte_Tomato_19587	#N/A	#N/A	-3.67507
BPA_Rashotte_Tomato_19180	Solyc09g091960	High mobility group family protein (AHRD V1 **-- D7KE87_ARALY)%3B contains Interpro domain(s) IPR001606 AT-rich interaction region	-3.67473
BPA_Rashotte_Tomato_19377	#N/A	#N/A	-3.66934
BPA_Rashotte_Tomato_13394	Solyc09g055570	Receptor like kinaseRLK	-3.66771
BPA_Rashotte_Tomato_12863	#N/A	#N/A	-3.6672
BPA_Rashotte_Tomato_16114	Solyc12g010260	Unknown Protein (AHRD V1)	-3.66502
BPA_Rashotte_Tomato_23254	#N/A	#N/A	-3.66293
BPA_Rashotte_Tomato_6384	Solyc10g077070	Histone-lysine N-methyltransferase (AHRD V1 *-** B6K768_SCHJY)%3B contains Interpro domain(s) IPR003105 SRA-YDG	-3.65509
BPA_Rashotte_Tomato_17252	Solyc07g064650	Arabidopsis thaliana genomic DNA chromosome 5 P1 clone MOK16 (AHRD V1 *--- Q9LYW2_ARATH)%3B contains Interpro domain(s) IPR007608 Protein of unknown function DUF584	-3.65287
BPA_Rashotte_Tomato_15271	Solyc10g085380	Alcohol dehydrogenase (Fragment) (AHRD V1 ***- Q6R4Y6_ZEALU)%3B contains Interpro domain(s) IPR002347 Glucose/ribitol dehydrogenase	-3.65166
BPA_Rashotte_Tomato_1646	Solyc05g052800	60S ribosomal protein L35a (AHRD V1 ***- B6VC50_VERFO)%3B contains Interpro domain(s) IPR001780 Ribosomal protein L35Ae	-3.64801
BPA_Rashotte_Tomato_7267	Solyc10g012430	Signal peptide peptidase (AHRD V1 **** Q9MA44_ARATH)%3B contains Interpro domain(s) IPR007369 Peptidase A22Bsignal peptide peptidase	-3.64466
BPA_Rashotte_Tomato_14286	Solyc07g053320	Fiber protein Fb32 (AHRD V1 *-*- Q6UA04_GOSBA)	-3.6416
BPA_Rashotte_Tomato_985	#N/A	#N/A	-3.63749
BPA_Rashotte_Tomato_14921	Solyc02g083700	Alpha-mannosidase (AHRD V1 **** Q9FKW9_ARATH)%3B contains Interpro domain(s) IPR011682 Glycosyl hydrolases 38C-terminal	-3.62975
BPA_Rashotte_Tomato_19960	#N/A	#N/A	-3.62332
BPA_Rashotte_Tomato_8980	Solyc09g092400	Ectonucleoside triphosphate diphosphohydrolase 5 (AHRD V1 **-- Q6P6S9_RAT)%3B contains Interpro domain(s) IPR000407 Nucleoside phosphatase GDA1/CD39	-3.61795
BPA_Rashotte_Tomato_5462	Solyc07g053980	Glucan synthase like 1 (AHRD V1 ***- D8R536_SELML)%3B contains Interpro domain(s) IPR003440 Glycosyl transferasefamily 48	-3.61238
BPA_Rashotte_Tomato_19861	Solyc04g040210	Unknown Protein (AHRD V1)	-3.60975
BPA_Rashotte_Tomato_9321	#N/A	#N/A	-3.60763
BPA_Rashotte_Tomato_16801	Solyc01g098480	Pentatricopeptide repeat-containing protein (AHRD V1 ***- D7LKZ8_ARALY)%3B contains Interpro domain(s) IPR002885 Pentatricopeptide repeat	-3.60738
BPA_Rashotte_Tomato_10354	Solyc07g065280	Os08g0431500 protein (Fragment) (AHRD V1 ***- Q0J5I8_ORYSJ)	-3.5774
BPA_Rashotte_Tomato_204	Solyc01g068000	Serine/threonine phosphatase family protein (AHRD V1 **** C1E0J1_9CHLO)%3B contains Interpro domain(s) IPR015655 Protein phosphatase 2C	-3.57569
BPA_Rashotte_Tomato_681	Solyc09g089550	Zinc finger-homeodomain protein 2 (Fragment) (AHRD V1 *--- B0LK10_ESCCA)%3B contains Interpro domain(s) IPR006456 ZF-HD homeobox protein Cys/His-rich dimerisation region	-3.57456
BPA_Rashotte_Tomato_658	Solyc11g042620	Nuclear transport factor 2 (NTF2)-like protein (AHRD V1 ***- Q67TV5_ORYSJ)%3B contains Interpro domain(s) IPR009959 Protein of unknown function DUF1486	-3.57266
BPA_Rashotte_Tomato_25213	#N/A	#N/A	-3.56957
BPA_Rashotte_Tomato_940	Solyc01g094840	RING finger protein 13 (AHRD V1 *-*- RNF13_RAT)%3B contains Interpro domain(s) IPR018957 Zinc fingerC3HC4 RING-type	-3.563
BPA_Rashotte_Tomato_2216	Solyc02g077890	E3 ubiquitin-protein ligase RING1 (AHRD V1 *-*- B0WQV3_CULQU)%3B contains Interpro domain(s) IPR001841 Zinc fingerRING-type IPR017907 Zinc fingerRING-typeconserved site	-3.55531
BPA_Rashotte_Tomato_6305	Solyc12g056350	Unknown Protein (AHRD V1)%3B contains Interpro domain(s) IPR013097 Stress responsive alpha-beta barrel	-3.55495
BPA_Rashotte_Tomato_14150	Solyc06g084570	Methyltransferase (AHRD V1 *-*- D5P6G9_9MYCO)	-3.54733
BPA_Rashotte_Tomato_28552	Solyc09g007900	Phenylalanine ammonia-lyase (AHRD V1 **** B5LAW0_CAPAN)%3B contains Interpro domain(s) IPR005922 Phenylalanine ammonia-lyase	-3.54629
BPA_Rashotte_Tomato_18281	Solyc07g005520	Potassium channel tetramerization domain-containing protein (AHRD V1 ***- D7LHH7_ARALY)%3B contains Interpro domain(s) IPR003131 Potassium channelvoltage dependentKv tetramerisation	-3.53755
BPA_Rashotte_Tomato_3510	Solyc01g065560	Os08g0100600 protein (Fragment) (AHRD V1 *-*- Q0J8P7_ORYSJ)%3B contains Interpro domain(s) IPR008507 Protein of unknown function DUF789	-3.53721
BPA_Rashotte_Tomato_21691	Solyc03g025940	F-box family protein (AHRD V1 ***- D7LS19_ARALY)%3B contains Interpro domain(s) IPR001810 Cyclin-like F-box	-3.53569
BPA_Rashotte_Tomato_19262	Solyc10g054820	Aquaporin (AHRD V1 ***- Q40266_MESCR)%3B contains Interpro domain(s) IPR000425 Major intrinsic protein	-3.5295
BPA_Rashotte_Tomato_19803	#N/A	#N/A	-3.52448
BPA_Rashotte_Tomato_26972	#N/A	#N/A	-3.52143
BPA_Rashotte_Tomato_1772	Solyc10g079440	FAD-dependent oxidoreductase family protein (AHRD V1 ***- D7LVK2_ARALY)%3B contains Interpro domain(s) IPR006076 FAD dependent oxidoreductase	-3.51498
BPA_Rashotte_Tomato_23482	#N/A	#N/A	-3.51482
BPA_Rashotte_Tomato_8450	#N/A	#N/A	-3.50894
BPA_Rashotte_Tomato_19961	Solyc02g085350	Succinate dehydrogenase flavoprotein subunit (AHRD V1 **** B8CCT7_THAPS)%3B contains Interpro domain(s) IPR011281 Succinate dehydrogenaseflavoprotein subunit	-3.50796
BPA_Rashotte_Tomato_2183	Solyc10g078320	AAA family ATPase CDC48 subfamily (AHRD V1 *--- D7D9J0_STAHD)%3B contains Interpro domain(s) IPR003959 ATPaseAAA-typecore	-3.50695
BPA_Rashotte_Tomato_22842	Solyc07g062270	Gamma-glutamyl hydrolase 2 (AHRD V1 **** D7MX15_ARALY)%3B contains Interpro domain(s) IPR015527 Peptidase C26gamma-glutamyl hydrolase	-3.50248
BPA_Rashotte_Tomato_22343	Solyc04g017750	Pathogen-induced calmodulin-binding protein (Fragment) (AHRD V1 *--- Q8H6W8_PHAVU)%3B contains Interpro domain(s) IPR012417 Calmodulin-bindingplant	-3.49188
BPA_Rashotte_Tomato_22391	Solyc09g005540	NAD-dependent epimerase/dehydratase (AHRD V1 *--- D0LL53_HALO1)%3B contains Interpro domain(s) IPR001046 Natural resistance-associated macrophage protein	-3.48817
BPA_Rashotte_Tomato_16017	Solyc02g092560	Phototropic-responsive NPH3 family protein (AHRD V1 **-- D7MMM6_ARALY)%3B contains Interpro domain(s) IPR004249 NPH3	-3.48802
BPA_Rashotte_Tomato_11402	#N/A	#N/A	-3.47947
BPA_Rashotte_Tomato_16814	Solyc06g049030	Ring finger protein (AHRD V1 ***- O49869_HORVU)%3B contains Interpro domain(s) IPR018957 Zinc fingerC3HC4 RING-type	-3.47756
BPA_Rashotte_Tomato_1945	Solyc08g007060	Peptide transporter-like protein (AHRD V1 **-* Q9SVS9_ARATH)%3B contains Interpro domain(s) IPR000109 TGF-beta receptortype I/II extracellular region	-3.47422
BPA_Rashotte_Tomato_12862	#N/A	#N/A	-3.47256
BPA_Rashotte_Tomato_25206	#N/A	#N/A	-3.46969
BPA_Rashotte_Tomato_16816	#N/A	#N/A	-3.46398
BPA_Rashotte_Tomato_27914	Solyc06g082870	60S ribosomal protein L5-1 (AHRD V1 ***- B6THG9_MAIZE)%3B contains Interpro domain(s) IPR005485 Ribosomal protein L5eukaryotic	-3.46372
BPA_Rashotte_Tomato_1449	Solyc01g008910	Scarecrow transcription factor family protein (AHRD V1 **-* D7MIP9_ARALY)%3B contains Interpro domain(s) IPR005202 GRAS transcription factor	-3.44723
BPA_Rashotte_Tomato_1065	Solyc03g121000	Unknown Protein (AHRD V1)	-3.44497
BPA_Rashotte_Tomato_6200	Solyc04g080440	Maf-like protein CV_0124 (AHRD V1 ***- B6TNZ3_MAIZE)%3B contains Interpro domain(s) IPR003697 Maf-like protein	-3.44202
BPA_Rashotte_Tomato_13660	Solyc04g081430	Mediator of RNA polymerase II transcription subunit 7 (AHRD V1 **** C1C4Y2_RANCA)%3B contains Interpro domain(s) IPR009244 Mediator complexsubunit Med7	-3.44182
BPA_Rashotte_Tomato_23731	#N/A	#N/A	-3.43645
BPA_Rashotte_Tomato_9038	#N/A	#N/A	-3.43498
BPA_Rashotte_Tomato_16015	Solyc09g090100	Cryptochrome 2	-3.43117
BPA_Rashotte_Tomato_19631	#N/A	#N/A	-3.42839
BPA_Rashotte_Tomato_17251	#N/A	#N/A	-3.42731
BPA_Rashotte_Tomato_27435	#N/A	#N/A	-3.42141
BPA_Rashotte_Tomato_15830	Solyc09g014910	Os03g0816700 protein (Fragment) (AHRD V1 ***- Q0DMC9_ORYSJ)%3B contains Interpro domain(s) IPR007612 Protein of unknown function DUF567	-3.41711
BPA_Rashotte_Tomato_10131	#N/A	#N/A	-3.41134
BPA_Rashotte_Tomato_8460	Solyc09g064780	At2g23590-like protein (Fragment) (AHRD V1 *-*- B2CXK6_CARAS)	-3.39001
BPA_Rashotte_Tomato_1020	Solyc01g103540	YTH domain family 2 (Predicted) (AHRD V1 *-*- B2GUU1_RAT)%3B contains Interpro domain(s) IPR007275 YT521-B-like protein	-3.38433
BPA_Rashotte_Tomato_1506	Solyc04g026210	Dual serine/threonine and tyrosine protein kinase (AHRD V1 **** DUSTY_APIME)%3B contains Interpro domain(s) IPR015783 ATMRK serine/threonine protein kinase-like	-3.37806
BPA_Rashotte_Tomato_18146	Solyc09g097860	Kinesin-like protein (AHRD V1 ***- Q9LUG0_ARATH)%3B contains Interpro domain(s) IPR010544 Kinesin-related	-3.37584
BPA_Rashotte_Tomato_13291	Solyc07g066070	Nucleic acid binding protein (AHRD V1 **-* B6TF49_MAIZE)%3B contains Interpro domain(s) IPR004087 K Homology	-3.37316
BPA_Rashotte_Tomato_12115	Solyc01g105570	Genomic DNA chromosome 5 P1 clone MBM17 (AHRD V1 ***- Q9LVN4_ARATH)	-3.36824
BPA_Rashotte_Tomato_1724	Solyc02g062780	Chromodomain-helicase-DNA-binding protein 6 (AHRD V1 **-* CHD6_HUMAN)%3B contains Interpro domain(s) IPR000330 SNF2-related	-3.36547
BPA_Rashotte_Tomato_12471	#N/A	#N/A	-3.36517
BPA_Rashotte_Tomato_554	Solyc03g046590	Genomic DNA chromosome 5 TAC clone K15E6 (AHRD V1 ***- Q9FMB4_ARATH)	-3.36437
BPA_Rashotte_Tomato_16261	#N/A	#N/A	-3.36184
BPA_Rashotte_Tomato_16944	Solyc08g077900	Expansin-like protein (AHRD V1 ***- Q0WRS3_ARATH)%3B contains Interpro domain(s) IPR007112 Expansin 45endoglucanase-like	-3.36066
BPA_Rashotte_Tomato_14968	Solyc04g082680	Chloroplast channel forming outer membrane protein (AHRD V1 ***- Q9SM57_PEA)	-3.36049
BPA_Rashotte_Tomato_18130	#N/A	#N/A	-3.34279
BPA_Rashotte_Tomato_13290	Solyc01g099260	Chaperone protein dnaJ (AHRD V1 *-*- A7J483_9EURY)%3B contains Interpro domain(s) IPR001623 Heat shock protein DnaJN-terminal	-3.32814
BPA_Rashotte_Tomato_19963	Solyc12g042800	Unknown Protein (AHRD V1)	-3.32563
BPA_Rashotte_Tomato_16815	Solyc04g055070	Mutator-like transposase (AHRD V1 *-*- Q9FW81_ORYSJ)%3B contains Interpro domain(s) IPR004332 TransposaseMuDRplant	-3.32113
BPA_Rashotte_Tomato_16818	Solyc01g087050	Zinc finger-like protein (AHRD V1 **-- Q9LT33_ARATH)%3B contains Interpro domain(s) IPR007087 Zinc fingerC2H2-type	-3.31368
BPA_Rashotte_Tomato_26589	#N/A	#N/A	-3.31068
BPA_Rashotte_Tomato_27531	#N/A	#N/A	-3.30977
BPA_Rashotte_Tomato_14411	Solyc02g070390	PTAC12 (AHRD V1 ***- D7LH29_ARALY)	-3.29675
BPA_Rashotte_Tomato_21942	Solyc12g088910	Unknown Protein (AHRD V1)	-3.29548
BPA_Rashotte_Tomato_7664	Solyc09g089760	1-aminocyclopropane-1-carboxylate oxidase-like protein (AHRD V1 **-* Q9LTH8_ARATH)%3B contains Interpro domain(s) IPR005123 Oxoglutarate and iron-dependent oxygenase	-3.29238
BPA_Rashotte_Tomato_6304	Solyc09g089870	Transcription factor (AHRD V1 **** D6MKE6_9ASPA)%3B contains Interpro domain(s) IPR011598 Helix-loop-helix DNA-binding	-3.28689
BPA_Rashotte_Tomato_23280	#N/A	#N/A	-3.28245
BPA_Rashotte_Tomato_7319	Solyc05g053930	ATP binding / serine-threonine kinase (AHRD V1 **** C5DB71_VITVI)%3B contains Interpro domain(s) IPR002290 Serine/threonine protein kinase	-3.28243
BPA_Rashotte_Tomato_24559	#N/A	#N/A	-3.27867
BPA_Rashotte_Tomato_20270	Solyc03g117440	ATP dependent RNA helicase (AHRD V1 **** B3LNW9_YEAS1)%3B contains Interpro domain(s) IPR011545 DNA/RNA helicaseDEAD/DEAH box typeN-terminal	-3.27762
BPA_Rashotte_Tomato_24936	#N/A	#N/A	-3.27441
BPA_Rashotte_Tomato_11031	#N/A	#N/A	-3.27392
BPA_Rashotte_Tomato_10781	Solyc12g016190	High mobility group family (Fragment) (AHRD V1 **-- B9GFX2_POPTR)%3B contains Interpro domain(s) IPR001606 AT-rich interaction region	-3.27233
BPA_Rashotte_Tomato_17630	#N/A	#N/A	-3.26013
BPA_Rashotte_Tomato_266	Solyc09g065650	Protein phosphatase 1L-like protein (AHRD V1 *--- D0NIG5_PHYIN)%3B contains Interpro domain(s) IPR015655 Protein phosphatase 2C	-3.25784
BPA_Rashotte_Tomato_2609	Solyc11g008150	Transcription elongation factor spt5 (AHRD V1 *-*- B6JZQ2_SCHJY)%3B contains Interpro domain(s) IPR005100 Supt5 repeat	-3.25423
BPA_Rashotte_Tomato_12460	Solyc08g007340	COPII coat assembly protein sec16 (AHRD V1 *-*- B2W276_PYRTR)	-3.24944
BPA_Rashotte_Tomato_17840	#N/A	#N/A	-3.2374
BPA_Rashotte_Tomato_21742	Solyc05g008060	Auxin efflux carrier (AHRD V1 **** D6RT10_SOLLC)%3B contains Interpro domain(s) IPR014024 Auxin efflux carriersubgroup	-3.22804
BPA_Rashotte_Tomato_9134	#N/A	#N/A	-3.22683
BPA_Rashotte_Tomato_2488	#N/A	#N/A	-3.2255
BPA_Rashotte_Tomato_28081	#N/A	#N/A	-3.20787
BPA_Rashotte_Tomato_17033	#N/A	#N/A	-3.19985
BPA_Rashotte_Tomato_22612	Solyc02g069090	Cathepsin B (AHRD V1 ***- Q1HER6_NICBE)%3B contains Interpro domain(s) IPR015643 Peptidase C1Acathepsin B	-3.1991
BPA_Rashotte_Tomato_15921	Solyc07g048070	Membrane protein (AHRD V1 **-- B6U5U8_MAIZE)%3B contains Interpro domain(s) IPR017214 Uncharacterised conserved protein UCP037471	-3.1945
BPA_Rashotte_Tomato_12152	Solyc01g106820	Peptidase M50 family (AHRD V1 ***- B6UET0_MAIZE)	-3.19327
BPA_Rashotte_Tomato_684	Solyc01g103010	Cullin-associated NEDD8-dissociated protein 2 (AHRD V1 ***- B0WPV6_CULQU)%3B contains Interpro domain(s) IPR011989 Armadillo-like helical	-3.17709
BPA_Rashotte_Tomato_16236	#N/A	#N/A	-3.1724
BPA_Rashotte_Tomato_1680	Solyc09g009790	Pentatricopeptide repeat-containing protein (AHRD V1 ***- D7L781_ARALY)%3B contains Interpro domain(s) IPR002885 Pentatricopeptide repeat	-3.17005
BPA_Rashotte_Tomato_3505	Solyc09g092440	Pentatricopeptide repeat-containing protein (AHRD V1 ***- D7LCN4_ARALY)%3B contains Interpro domain(s) IPR002885 Pentatricopeptide repeat	-3.1677
BPA_Rashotte_Tomato_3341	Solyc08g081280	Cell division protein kinase 2 (AHRD V1 ***- C1C4M4_RANCA)%3B contains Interpro domain(s) IPR002290 Serine/threonine protein kinase	-3.16549
BPA_Rashotte_Tomato_2455	Solyc01g067570	Unknown Protein (AHRD V1)	-3.15558
BPA_Rashotte_Tomato_6301	Solyc07g066180	ATP/GTP-binding protein (AHRD V1 *--- A8L7D9_FRASN)%3B contains Interpro domain(s) IPR003593 ATPaseAAA+ typecore	-3.14563
BPA_Rashotte_Tomato_23430	#N/A	#N/A	-3.14398
BPA_Rashotte_Tomato_6383	Solyc11g072330	Response regulator 8 (AHRD V1 ***- Q9AV93_MAIZE)%3B contains Interpro domain(s) IPR006447 Myb-like DNA-binding regionSHAQKYF class	-3.14318
BPA_Rashotte_Tomato_25172	#N/A	#N/A	-3.13181
BPA_Rashotte_Tomato_22443	Solyc09g092740	Unknown Protein (AHRD V1)%3B contains Interpro domain(s) IPR010800 Glycine rich	-3.13015
BPA_Rashotte_Tomato_19735	#N/A	#N/A	-3.11556
BPA_Rashotte_Tomato_16121	Solyc05g050580	E3 ubiquitin-protein ligase sina (AHRD V1 **-* B0WR23_CULQU)%3B contains Interpro domain(s) IPR004162 Seven in absentia protein	-3.11507
BPA_Rashotte_Tomato_4862	Solyc03g026130	Cytochrome P450	-3.11386
BPA_Rashotte_Tomato_20986	Solyc01g109180	Long-chain-fatty-acid-CoA ligase (AHRD V1 ***- B2WS80_ARAHA)%3B contains Interpro domain(s) IPR000873 AMP-dependent synthetase and ligase	-3.11096
BPA_Rashotte_Tomato_18007	#N/A	#N/A	-3.11064
BPA_Rashotte_Tomato_11081	Solyc03g005930	Cyclic phosphodiesterase (AHRD V1 ***- D7M9D2_ARALY)%3B contains Interpro domain(s) IPR012386 2 3 cyclic phosphodiesteraseplant	-3.10994
BPA_Rashotte_Tomato_2985	Solyc02g084950	Carboxyl methyltransferase 4 (AHRD V1 **** B0ZB58_HUMLU)%3B contains Interpro domain(s) IPR005299 SAM dependent carboxyl methyltransferase	-3.1075
BPA_Rashotte_Tomato_18641	Solyc01g088760	Cytochrome P450	-3.10532
BPA_Rashotte_Tomato_22191	#N/A	#N/A	-3.09717
BPA_Rashotte_Tomato_24810	#N/A	#N/A	-3.09652
BPA_Rashotte_Tomato_21671	#N/A	#N/A	-3.09172
BPA_Rashotte_Tomato_38	Solyc07g061920	Glucan synthase like 3 (AHRD V1 ***- D8R8I5_SELML)%3B contains Interpro domain(s) IPR003440 Glycosyl transferasefamily 48	-3.08708
BPA_Rashotte_Tomato_26451	Solyc07g063810	ARK2 product/receptor-like serine/threonine protein kinase ARK2 (AHRD V1 *-** Q9S972_ARATH)%3B contains Interpro domain(s) IPR002290 Serine/threonine protein kinase	-3.07473
BPA_Rashotte_Tomato_20515	Solyc01g067700	Unknown Protein (AHRD V1)	-3.06407
BPA_Rashotte_Tomato_8256	Solyc02g084570	Cytochrome P450	-3.06042
BPA_Rashotte_Tomato_693	Solyc01g105890	(E)-beta-ocimene synthase (AHRD V1 **** Q5CD81_CITUN)%3B contains Interpro domain(s) IPR005630 Terpene synthasemetal-binding domain	-3.03907
BPA_Rashotte_Tomato_20461	Solyc04g054260	Cytochrome P450	-3.03854
BPA_Rashotte_Tomato_22925	#N/A	#N/A	-3.03249
BPA_Rashotte_Tomato_27285	#N/A	#N/A	-3.02753
BPA_Rashotte_Tomato_20111	Solyc03g123760	Phytoene desaturase	-3.00483
BPA_Rashotte_Tomato_25804	Solyc05g013010	Sulfotransferase family protein (AHRD V1 **** D7LQL2_ARALY)%3B contains Interpro domain(s) IPR000863 Sulfotransferase	-3.00138
BPA_Rashotte_Tomato_1191	Solyc03g007530	Multidrug resistance protein ABC transporter family (AHRD V1 **-- B9GX56_POPTR)%3B contains Interpro domain(s) IPR003439 ABC transporter-like	-2.9817
BPA_Rashotte_Tomato_20667	#N/A	#N/A	-2.98152
BPA_Rashotte_Tomato_12470	Solyc00g012310	Retrovirus-related Pol polyprotein from type-1 retrotransposable element R2 (Fragment) (AHRD V1 **-- PO21_NASVI)%3B contains Interpro domain(s) IPR015706 RNA-directed DNA polymerase (reverse transcriptase)related	-2.97648
BPA_Rashotte_Tomato_786	Solyc06g007640	FRIGIDA-LIKE 2 (AHRD V1 *-*- A0SWL0_ARATH)%3B contains Interpro domain(s) IPR012474 Frigida-like	-2.966
BPA_Rashotte_Tomato_1657	Solyc12g055750	Vacuolar cation/proton exchanger 2 (AHRD V1 ***- B6UEI1_MAIZE)%3B contains Interpro domain(s) IPR004713 Calcium/proton exchanger	-2.96092
BPA_Rashotte_Tomato_15280	Solyc07g063430	Mpv17 protein (AHRD V1 *--- B0WWR6_CULQU)%3B contains Interpro domain(s) IPR007248 Mpv17/PMP22	-2.95977
BPA_Rashotte_Tomato_8152	Solyc06g068550	Aspartic proteinase nepenthesin-1 (AHRD V1 **-- C0JAB4_ORYCO)%3B contains Interpro domain(s) IPR001461 Peptidase A1	-2.94848
BPA_Rashotte_Tomato_27433	#N/A	#N/A	-2.94668
BPA_Rashotte_Tomato_16828	Solyc07g040890	CXE carboxylesterase (Fragment) (AHRD V1 **-* Q0ZPV6_9ERIC)%3B contains Interpro domain(s) IPR013094 Alpha/beta hydrolase fold-3	-2.94667
BPA_Rashotte_Tomato_28600	#N/A	#N/A	-2.9447
BPA_Rashotte_Tomato_1052	Solyc06g075790	Genomic DNA chromosome 5 P1 clone MMN10 (AHRD V1 **-- Q9FJF2_ARATH)	-2.93999
BPA_Rashotte_Tomato_20524	#N/A	#N/A	-2.93978
BPA_Rashotte_Tomato_24080	Solyc01g103320	Zinc finger CCCH domain-containing protein 44 (AHRD V1 *--- C3H44_ARATH)%3B contains Interpro domain(s) IPR018144 Plus-3 domainsubgroup	-2.93677
BPA_Rashotte_Tomato_15554	Solyc02g080100	NHL1 (Fragment) (AHRD V1 **-- B0LZH6_ARATH)%3B contains Interpro domain(s) IPR010847 Harpin-induced 1	-2.93622
BPA_Rashotte_Tomato_15885	#N/A	#N/A	-2.922
BPA_Rashotte_Tomato_27432	#N/A	#N/A	-2.91848
BPA_Rashotte_Tomato_6942	Solyc09g065120	Preprotein translocase secY subunit (AHRD V1 ***- B6U7Q0_MAIZE)%3B contains Interpro domain(s) IPR002208 SecY protein	-2.91314
BPA_Rashotte_Tomato_19748	#N/A	#N/A	-2.91002
BPA_Rashotte_Tomato_3492	#N/A	#N/A	-2.90429
BPA_Rashotte_Tomato_18160	Solyc12g006010	Small ubiquitin-related modifier (AHRD V1 ***- A6BMG7_COPCI)%3B contains Interpro domain(s) IPR000626 Ubiquitin	-2.89874
BPA_Rashotte_Tomato_18062	Solyc12g013570	Cell number regulator 10 (AHRD V1 **-- D9HP26_MAIZE)%3B contains Interpro domain(s) IPR006461 Protein of unknown function Cys-rich	-2.89431
BPA_Rashotte_Tomato_16886	Solyc08g005320	F-box family protein (AHRD V1 ***- B9GFH4_POPTR)%3B contains Interpro domain(s) IPR006566 FBD-like	-2.8935
BPA_Rashotte_Tomato_9241	#N/A	#N/A	-2.88998
BPA_Rashotte_Tomato_20456	Solyc03g083420	OBP3-responsive gene 1 (AHRD V1 **-- D7MSY5_ARALY)%3B contains Interpro domain(s) IPR002290 Serine/threonine protein kinase	-2.88743
BPA_Rashotte_Tomato_6771	Solyc03g115420	F-box domain containing protein (AHRD V1 ***- Q2QXK7_ORYSJ)%3B contains Interpro domain(s) IPR005174 Protein of unknown function DUF295	-2.88712
BPA_Rashotte_Tomato_10358	Solyc01g088090	Hydrolase alpha/beta fold family protein (AHRD V1 ***- D7M5W5_ARALY)%3B contains Interpro domain(s) IPR000073 Alpha/beta hydrolase fold-1	-2.87408
BPA_Rashotte_Tomato_16125	Solyc09g007010	Pathogenesis related protein PR-1 (AHRD V1 **-- Q9SC15_SOLTU)%3B contains Interpro domain(s) IPR002413 Ves allergen	-2.87273
BPA_Rashotte_Tomato_492	Solyc12g038330	Unknown Protein (AHRD V1)	-2.86506
BPA_Rashotte_Tomato_539	Solyc12g009510	LRR receptor-like serine/threonine-protein kinaseRLP	-2.86088
BPA_Rashotte_Tomato_17	Solyc08g077670	DNA repair and recombination protein RAD54 (AHRD V1 *--- C9SRD1_VERA1)%3B contains Interpro domain(s) IPR000330 SNF2-related	-2.85516
BPA_Rashotte_Tomato_739	Solyc08g061890	Retinoblastoma binding protein 6 (AHRD V1 *--- Q866R2_HORSE)%3B contains Interpro domain(s) IPR014891 DWNN domain	-2.85403
BPA_Rashotte_Tomato_22744	#N/A	#N/A	-2.85109
BPA_Rashotte_Tomato_306	Solyc03g117570	Pentatricopeptide repeat-containing protein (AHRD V1 ***- D7M6Q4_ARALY)%3B contains Interpro domain(s) IPR002885 Pentatricopeptide repeat	-2.85054
BPA_Rashotte_Tomato_6774	Solyc03g115900	Chlorophyll a-b binding protein P4chloroplastic (AHRD V1 ***- CB24_PEA)%3B contains Interpro domain(s) IPR001344 Chlorophyll A-B binding protein	-2.82841
BPA_Rashotte_Tomato_22712	#N/A	#N/A	-2.8274
BPA_Rashotte_Tomato_7265	Solyc02g087800	Aldose-1-epimerase-like protein (AHRD V1 **** O48971_TOBAC)%3B contains Interpro domain(s) IPR015443 Aldose-1-epimerase	-2.82624
BPA_Rashotte_Tomato_21281	#N/A	#N/A	-2.82093
BPA_Rashotte_Tomato_28291	#N/A	#N/A	-2.81738
BPA_Rashotte_Tomato_2662	Solyc09g064590	Pre-mRNA-processing factor 39 (AHRD V1 *-** C5FSC0_NANOT)%3B contains Interpro domain(s) IPR003107 RNA-processing proteinHAT helix	-2.81719
BPA_Rashotte_Tomato_20140	Solyc11g030860	RNA-dependent RNA polymerase (AHRD V1 **-- O92614_9VIRU)	-2.80134
BPA_Rashotte_Tomato_18144	Solyc04g016160	F-box/LRR-repeat protein At5g63520 (AHRD V1 ***- D7MPP7_ARALY)%3B contains Interpro domain(s) IPR019494 FIST C domain	-2.78965
BPA_Rashotte_Tomato_26452	#N/A	#N/A	-2.78809
BPA_Rashotte_Tomato_21002	Solyc01g100950	Glucose-6-phosphate 1-dehydrogenase (AHRD V1 ***- B9RFN8_RICCO)%3B contains Interpro domain(s) IPR001282 Glucose-6-phosphate dehydrogenase	-2.78155
BPA_Rashotte_Tomato_774	Solyc03g117300	Nodulin-like protein (AHRD V1 ***- Q8H6R3_PONTR)%3B contains Interpro domain(s) IPR010658 Nodulin-like	-2.78022
BPA_Rashotte_Tomato_14176	Solyc07g065820	Calcineurin B (AHRD V1 ***- Q8L7F6_PEA)%3B contains Interpro domain(s) IPR015757 Calcineurin B protein	-2.7798
BPA_Rashotte_Tomato_9456	#N/A	#N/A	-2.77971
BPA_Rashotte_Tomato_26087	#N/A	#N/A	-2.77296
BPA_Rashotte_Tomato_501	Solyc10g074620	Cellulose synthase D-like protein (AHRD V1 ***- Q93XQ0_NICAL)%3B contains Interpro domain(s) IPR005150 Cellulose synthase	-2.76931
BPA_Rashotte_Tomato_18751	Solyc12g100020	LRR receptor-like serine/threonine-protein kinaseRLP	-2.76839
BPA_Rashotte_Tomato_15811	#N/A	#N/A	-2.76419
BPA_Rashotte_Tomato_16111	#N/A	#N/A	-2.76199
BPA_Rashotte_Tomato_1169	Solyc09g060080	Genomic DNA chromosome 3 TAC clone K7P8 (AHRD V1 *--- Q9LRX3_ARATH)%3B contains Interpro domain(s) IPR013999 HAS subgroup	-2.75732
BPA_Rashotte_Tomato_10874	Solyc10g052630	Pol polyprotein (AHRD V1 *-*- POL_BAEVM)%3B contains Interpro domain(s) IPR001584 Integrasecatalytic core	-2.74753
BPA_Rashotte_Tomato_18481	Solyc08g066840	Aquaporin-like protein (AHRD V1 ***- O65860_PICAB)%3B contains Interpro domain(s) IPR012269 Aquaporin	-2.74662
BPA_Rashotte_Tomato_62	Solyc09g055260	RING zinc finger-containing protein (AHRD V1 *--- D3BGF4_POLPA)%3B contains Interpro domain(s) IPR016024 Armadillo-type fold	-2.74136
BPA_Rashotte_Tomato_3857	Solyc09g092130	Sucrose phosphate synthase (AHRD V1 ***- D6R6Y5_9LILI)%3B contains Interpro domain(s) IPR012819 Sucrose phosphate synthaseplant	-2.74059
BPA_Rashotte_Tomato_5720	Solyc03g115500	Heparanase (AHRD V1 **** C9E7B7_ORYSI)%3B contains Interpro domain(s) IPR005199 Glycoside hydrolase family 79N-terminal	-2.73969
BPA_Rashotte_Tomato_17200	Solyc04g005540	Cc-nbs-lrrresistance protein	-2.73871
BPA_Rashotte_Tomato_24232	Solyc07g052740	Storekeeper protein (AHRD V1 ***- Q94IK2_SOLTU)	-2.73721
BPA_Rashotte_Tomato_14242	Solyc03g044660	Dihydrodipicolinate synthase 2 (AHRD V1 **** D7LCJ3_ARALY)%3B contains Interpro domain(s) IPR005263 Dihydrodipicolinate synthase subfamily	-2.73483
BPA_Rashotte_Tomato_2088	Solyc08g079890	Subtilisin-like protease (AHRD V1 **-- Q9LWA3_SOLLC)%3B contains Interpro domain(s) IPR015500 Peptidase S8subtilisin-related	-2.73171
BPA_Rashotte_Tomato_24230	#N/A	#N/A	-2.72987
BPA_Rashotte_Tomato_7314	Solyc12g014610	WRKY transcription factor 78 (AHRD V1 ***- Q5HZ67_ORYSA)%3B contains Interpro domain(s) IPR003657 DNA-binding WRKY	-2.72692
BPA_Rashotte_Tomato_424	Solyc12g005620	LRR receptor-like serine/threonine-protein kinaseRLP	-2.72056
BPA_Rashotte_Tomato_8640	Solyc08g077530	Beta-amylase (AHRD V1 **** Q5F305_SOYBN)%3B contains Interpro domain(s) IPR001371 Glycoside hydrolasefamily 14Bplant	-2.71573
BPA_Rashotte_Tomato_3342	Solyc03g096380	Amino acid permease-like protein proline transporter-like protein (AHRD V1 **** Q9FJ34_ARATH)%3B contains Interpro domain(s) IPR013057 Amino acid transportertransmembrane	-2.71323
BPA_Rashotte_Tomato_804	Solyc02g088110	Polypyrimidine tract-binding protein-like (AHRD V1 **** Q2XTB3_SOLTU)%3B contains Interpro domain(s) IPR012677 Nucleotide-bindingalpha-beta plait	-2.71019
BPA_Rashotte_Tomato_8248	Solyc05g051800	Zinc finger C3HC4 type family protein (AHRD V1 ***- B6TBG5_MAIZE)%3B contains Interpro domain(s) IPR011016 Zinc fingerRING-CH-type	-2.69847
BPA_Rashotte_Tomato_25942	#N/A	#N/A	-2.69531
BPA_Rashotte_Tomato_1721	Solyc08g065890	Epsin (AHRD V1 *-*- D3BQV6_POLPA)%3B contains Interpro domain(s) IPR001026 EpsinN-terminal	-2.6938
BPA_Rashotte_Tomato_12801	Solyc02g081950	Calmodulin-binding protein (AHRD V1 **-* D7MJB3_ARALY)%3B contains Interpro domain(s) IPR009097 RNA ligase/cyclic nucleotide phosphodiesterase	-2.68543
BPA_Rashotte_Tomato_24461	#N/A	#N/A	-2.68511
BPA_Rashotte_Tomato_22063	Solyc10g084100	RING finger protein B (AHRD V1 *-*- RNGB_DICDI)%3B contains Interpro domain(s) IPR001841 Zinc fingerRING-type	-2.6848
BPA_Rashotte_Tomato_19612	Solyc01g100900	MtN21 nodulin protein-like (AHRD V1 ***- B6TBZ6_MAIZE)%3B contains Interpro domain(s) IPR000620 Protein of unknown function DUF6transmembrane	-2.68275
BPA_Rashotte_Tomato_24732	#N/A	#N/A	-2.68173
BPA_Rashotte_Tomato_20004	Solyc12g057100	Purine permease family protein (AHRD V1 **-- D7MCV2_ARALY)%3B contains Interpro domain(s) IPR004853 Protein of unknown function DUF250	-2.68103
BPA_Rashotte_Tomato_14183	Solyc11g011570	RING finger protein 44 (AHRD V1 *--- RNF44_DANRE)%3B contains Interpro domain(s) IPR011016 Zinc fingerRING-CH-type	-2.68024
BPA_Rashotte_Tomato_23021	#N/A	#N/A	-2.66055
BPA_Rashotte_Tomato_18211	#N/A	#N/A	-2.65726
BPA_Rashotte_Tomato_723	Solyc03g098450	Protein Kinase interacting protein (AHRD V1 ***- B6TI58_MAIZE)%3B contains Interpro domain(s) IPR011684 KIP1-like	-2.65683
BPA_Rashotte_Tomato_21376	#N/A	#N/A	-2.64495
BPA_Rashotte_Tomato_13222	Solyc06g007510	Ubiquitin-conjugating enzyme E2 8 (AHRD V1 **** UBC8_ARATH)%3B contains Interpro domain(s) IPR000608 Ubiquitin-conjugating enzymeE2	-2.6445
BPA_Rashotte_Tomato_1330	Solyc04g074180	Cryptochrome 1a	-2.64434
BPA_Rashotte_Tomato_1922	Solyc01g106350	Glutamyl-tRNA(Gln) amidotransferase subunit A (AHRD V1 ***- C5FFK2_NANOT)%3B contains Interpro domain(s) IPR000120 Amidase signature enzyme	-2.64125
BPA_Rashotte_Tomato_22870	#N/A	#N/A	-2.63684
BPA_Rashotte_Tomato_1683	Solyc02g070530	Potassium channel (AHRD V1 ***- O24382_SOLTU)%3B contains Interpro domain(s) IPR000595 Cyclic nucleotide-binding	-2.63526
BPA_Rashotte_Tomato_631	Solyc10g044470	Voltage-gated chloride channel (AHRD V1 **** Q96325_ARATH)%3B contains Interpro domain(s) IPR002251 Chloride channel plant CLC	-2.63501
BPA_Rashotte_Tomato_18175	Solyc01g095240	Unknown Protein (AHRD V1)	-2.6346
BPA_Rashotte_Tomato_13114	Solyc03g080100	Copper-translocating P-type ATPase (AHRD V1 *--- Q3JHP1_BURP1)%3B contains Interpro domain(s) IPR006121 Heavy metal transport/detoxification protein	-2.63205
BPA_Rashotte_Tomato_18585	#N/A	#N/A	-2.62678
BPA_Rashotte_Tomato_856	Solyc10g007470	HAT family dimerisation domain containing protein expressed (AHRD V1 **-- Q6AVI0_ORYSJ)%3B contains Interpro domain(s) IPR008906 HAT dimerisation	-2.61055
BPA_Rashotte_Tomato_15977	Solyc01g108600	Presequence proteasemitochondrial (AHRD V1 **-- PREP_DANRE)%3B contains Interpro domain(s) IPR013578 Peptidase M16C associated	-2.60354
BPA_Rashotte_Tomato_10910	Solyc12g044700	F-box family protein (AHRD V1 ***- B9I3S8_POPTR)	-2.60056
BPA_Rashotte_Tomato_9454	Solyc07g063530	Unknown Protein (AHRD V1)	-2.59986
BPA_Rashotte_Tomato_796	Solyc01g094330	Expressed protein with function in citronellol catabolism (AHRD V1 **-- C0VQA1_9GAMM)%3B contains Interpro domain(s) IPR010839 Protein of unknown function DUF1446	-2.59715
BPA_Rashotte_Tomato_15111	Solyc11g069620	Cc-nbs-lrrresistance protein	-2.5906
BPA_Rashotte_Tomato_16422	Solyc02g062020	Ras-like GTP-binding protein RHO (AHRD V1 **-- RHO_APLCA)%3B contains Interpro domain(s) IPR003578 Ras small GTPaseRho type	-2.58999
BPA_Rashotte_Tomato_312	Solyc11g067310	Uncharacterized ABC transporter ATP-binding protein/permease C9B6.09c (AHRD V1 *--- YNT9_SCHPO)%3B contains Interpro domain(s) IPR003439 ABC transporter-like	-2.58621
BPA_Rashotte_Tomato_18644	Solyc03g097640	Mitochondrial import inner membrane translocase subunit Tim8 (AHRD V1 ***- B6SQH6_MAIZE)%3B contains Interpro domain(s) IPR004217 Mitochondrial inner membrane translocase complexTim8/9/10/13-zinc finger-like	-2.58094
BPA_Rashotte_Tomato_28308	#N/A	#N/A	-2.57934
BPA_Rashotte_Tomato_94	Solyc05g017810	Unknown Protein (AHRD V1)	-2.57825
BPA_Rashotte_Tomato_1206	Solyc01g109430	PPPDE peptidase domain-containing protein 1 (AHRD V1 **-- PPDE1_XENLA)%3B contains Interpro domain(s) IPR008580 Protein of unknown function DUF862eukaryotic	-2.56936
BPA_Rashotte_Tomato_6631	#N/A	#N/A	-2.56711
BPA_Rashotte_Tomato_19582	#N/A	#N/A	-2.56657
BPA_Rashotte_Tomato_4373	#N/A	#N/A	-2.56651
BPA_Rashotte_Tomato_27430	#N/A	#N/A	-2.56016
BPA_Rashotte_Tomato_13391	#N/A	#N/A	-2.55586
BPA_Rashotte_Tomato_727	Solyc01g110020	BAH-PHD domain-containing protein (Fragment) (AHRD V1 **-- A9S8N5_PHYPA)%3B contains Interpro domain(s) IPR001025 Bromo adjacent region	-2.55057
BPA_Rashotte_Tomato_10880	#N/A	#N/A	-2.54737
BPA_Rashotte_Tomato_16782	#N/A	#N/A	-2.54706
BPA_Rashotte_Tomato_1537	Solyc07g064700	DNA-binding bromodomain-containing protein (AHRD V1 *-** D7KJ43_ARALY)%3B contains Interpro domain(s) IPR001487 Bromodomain	-2.54349
BPA_Rashotte_Tomato_6753	Solyc12g010350	60S ribosomal protein L39 (AHRD V1 ***- D3GC11_9ROSI)%3B contains Interpro domain(s) IPR000077 Ribosomal protein L39e	-2.53593
BPA_Rashotte_Tomato_25940	Solyc11g072600	AP2-like ethylene-responsive transcription factor At1g79700 (AHRD V1 *--- AP2L3_ARATH)%3B contains Interpro domain(s) IPR001471 Pathogenesis-related transcriptional factor and ERFDNA-binding	-2.53382
BPA_Rashotte_Tomato_8972	Solyc01g091380	Microtubule-associated protein MAP65-1a (AHRD V1 **** Q9FEV9_TOBAC)%3B contains Interpro domain(s) IPR007145 MAP65/ASE1	-2.52526
BPA_Rashotte_Tomato_19131	Solyc08g015940	EPIDERMAL PATTERNING FACTOR-like protein 6 (AHRD V1 *-*- EPFL6_ARATH)	-2.52263
BPA_Rashotte_Tomato_6945	#N/A	#N/A	-2.51158
BPA_Rashotte_Tomato_633	Solyc06g074650	AP-2 complex subunit alpha (AHRD V1 ***- C0NYN0_AJECG)%3B contains Interpro domain(s) IPR017104 Adaptor protein complex AP-2alpha subunit	-2.51122
BPA_Rashotte_Tomato_1769	Solyc02g024070	Class III homeodomain-leucine zipper (AHRD V1 ***- Q1WD30_GINBI)%3B contains Interpro domain(s) IPR013978 MEKHLA	-2.5098
BPA_Rashotte_Tomato_7663	Solyc05g055200	Heat shock-like protein (AHRD V1 **-- B5A254_ARATH)%3B contains Interpro domain(s) IPR004176 ClpN-terminal	-2.50709
BPA_Rashotte_Tomato_16207	#N/A	#N/A	-2.50547
BPA_Rashotte_Tomato_27427	#N/A	#N/A	-2.50498
BPA_Rashotte_Tomato_16122	Solyc06g071430	T17H3.1 protein (Fragment) (AHRD V1 ***- Q9SXD0_ARATH)	-2.50476
BPA_Rashotte_Tomato_10761	Solyc01g080870	Peptide transporter-like protein (AHRD V1 **-* Q9SVS9_ARATH)%3B contains Interpro domain(s) IPR000109 TGF-beta receptortype I/II extracellular region	-2.49801
