# Supplementary material for: Transcriptome Analysis of Cytokinin Response in Tomato Leaves
Source: PLoS One. 2013 Jan 25;8(1):e55090. doi: 10.1371/journal.pone.0055090 (PMC3555872; doi:10.1371/journal.pone.0055090)
Supplement: Table S4 — Transcripts identified as up-regulated or repressed 2.5 log2 fold by cytokinin in young leaves. The 2 h cytokinin treatment repressed a large number of transcripts and only the top 100 transcripts identified as most highly repressed by cytokinin were listed here (the rest of these are shown in Table S1). FC = fold change. (XLSX) [file pone.0055090.s004.xlsx]

## Sheet: Sheet1
	Cytokinin induced transcripts in young plants (2h)			Cytokinin repressed transcripts in young plants (2h)			Cytokinin induced transcripts in young plants (24h)			Cytokinin repressed transcripts in young plants (24h)
Solyc_ID	Solyc_Description	log2FC*	Solyc_ID	Solyc_Description	log2FC	Solyc_ID	Solyc_Description	log2FC	Solyc_ID	Solyc_Description	Log2 FC
Solyc07g006630	CONSTANS-like protein	7.3449	SGN-U568332	Unknown	-11.0412	Solyc12g008900	SlCKX6	7.88339	Solyc10g080980	Nodulin MtN21 family protein (Fragment)	-6.34361
Solyc12g009930	UDP-glucuronosyltransferase 1-6	5.53121	Solyc07g007700	Isoprenylcysteine carboxyl methyltransferase	-9.80437	SGN-U581385	hypothetical protein VITISV_002825	7.32412	Solyc05g006870	Thioredoxin H	-6.22966
Solyc07g008520	Peptide transporter	5.48663	Solyc07g062500	Cytochrome P450	-9.7513	Solyc01g100440	Transcription regulatory protein SNF5	7.23617	Solyc03g033410	Ubiquitin-conjugating enzyme E2 10	-5.50262
Solyc04g016430	SlCKX5	5.40759	Solyc10g076250	Aminotransferase like protein	-9.65457	Solyc06g048930	SlRRA6	5.93548	Solyc07g043390	Cellulose synthase family protein expressed	-5.26769
Solyc06g069730	Chlorophyll a/b binding protein 4 chloroplastic	4.73656	Solyc11g069050	4-coumarate-CoA ligase	-9.64904	Solyc01g060350	Unknown protein	5.5992	Solyc00g058890	Unknown Protein	-5.10801
Solyc09g064910	tRNA dimethylallyltransferase	4.56724	Solyc08g006420	Myosin-like protein (Fragment)	-9.40433	Solyc01g088160	SlCKX2	5.38917	Solyc01g100920	Nodulin-like protein	-5.08389
Solyc07g043420	2-oxoglutarate-dependent dioxygenase	4.3506	Solyc04g025650	Monooxygenase FAD-binding IPR003042 Aromatic-ring hydroxylase-like	-9.18629	Solyc06g034410	unknown protein	5.29831	Solyc07g008210	TPR domain protein	-5.02362
Solyc01g100440	Transcription regulatory protein SNF5	4.18278	Solyc11g064960	Unknown protein	-8.9319	Solyc09g074480	unkown protein	5.16313	Solyc07g007250	Metallocarboxypeptidase inhibitor	-4.87861
Solyc09g074490	unknown protein	4.15605	Solyc10g047910	Unknown protein	-8.89373	SGN-U583032	unknown	5.05724	Solyc12g040790	Menaquinone biosynthesis methyltransferase ubiE	-4.83383
Solyc04g015750	Magnesium chelatase H subunit	4.14231	SGN-U592967	Unknown	-8.84643	Solyc10g079600	SlRRA3	5.01728	Solyc03g098790	Kunitz-type protease inhibitor	-4.67053
Solyc06g048930	SlRRA6	4.1236	Solyc05g016230	Breast cancer type 1 susceptibility protein homolog (Fragment)	-8.70986	Solyc07g062140	Alpha alpha-trehalose-phosphate synthase	4.91223	Solyc02g069490	FAD linked oxidase domain protein	-4.66627
Solyc07g007560	Vesicular glutamate transporter 3	3.98441	Solyc11g066080	Genomic DNA chromosome 5 BAC clone F2O15	-8.66252	Solyc07g008540	CONSTANS-like zinc finger protein	4.77045	Solyc07g049150	Ribonuclease III family protein	-4.57492
Solyc01g108210	Cytochrome P450	3.75154	Solyc06g005520	ATP binding / serine-threonine kinase	-8.31334	Solyc07g056610	Carboxyl-terminal proteinase	4.75463	Solyc04g071790	Cytochrome P450	-4.52801
Solyc12g011450	Chlorophyll a/b binding protein 13 chloroplastic	3.73911	Solyc02g089870	Ring figure protein 5	-8.12357	Solyc04g011970	Gag-Pol polyprotein	4.68865	Solyc07g043460	Cytochrome P450	-4.32237
Solyc01g088160	SlCKX2	3.71004	Solyc11g017280	Receptor like kinase RLK	-8.03162	Solyc12g068060	Unknown Protein	4.62831	Solyc07g043420	2-oxoglutarate-dependent dioxygenase	-4.29308
Solyc11g013590	High mobility group family	3.61951	Solyc07g017610	Saccharopine dehydrogenase (NAD(+) L-glutamate-forming)	-8.01421	Solyc04g008110	Histidine kinase 4	4.56044	Solyc11g008030	Laccase-16	-4.1406
Solyc07g054580	SlGH3-8	3.40889	Solyc04g077030	Xylulose kinase	-8.01005	Solyc00g075030	Gag polyprotein IPR001878 Zinc finger CCHC-type	4.55278	Solyc04g016200	UDP-glucosyltransferase HvUGT5876	-3.94879
Solyc07g007780	Receptor-like kinase	3.36124	Solyc03g113630	Pentatricopeptide repeat-containing protein	-7.99194	Solyc05g052880	Unknown Protein	4.51911	Solyc08g006520	GDU1	-3.79743
Solyc11g066670	UDP-glucosyltransferase	3.35532	Solyc05g007960	Os01g0841200 protein (Fragment)	-7.98835	Solyc09g082080	Plant-specific domain TIGR01568 family protein	4.29947	Solyc08g008370	Genomic DNA chromosome 5 P1 clone MJC20	-3.73569
Solyc06g034410	unknown protein	3.30018	Solyc02g089720	Endo-beta-1 3-glucanase	-7.93493	Solyc07g007360	Os07g0175100 protein (Fragment)	4.28022	Solyc02g087280	Peptide transporter	-3.72155
SGN-U578484	carbonic anhydrase	3.20445	Solyc11g007980	Cytochrome P450	-7.81582	Solyc07g053360	Seed biotin-containing protein SBP65	4.21733	Solyc03g020060	Proteinase inhibitor II	-3.69907
Solyc03g006030	Receptor like kinase RLK	3.18045	Solyc07g054500	Receptor like kinase RLK	-7.53986	Solyc06g082620	RNA-binding protein PNO1-like protein	4.15219	Solyc01g100900	MtN21 nodulin protein-like	-3.68641
Solyc07g007360	Os07g0175100 protein (Fragment)	3.15605	Solyc02g079250	bisphosphate nucleotidase-like protein	-7.40091	Solyc05g006420	SlRRA1	4.02173	Solyc01g007010	U-box domain-containing protein	-3.68425
SGN-U574850	unknown	3.13334	Solyc05g014500	Multidrug resistance protein ABC transporter family	-7.37022	Solyc00g068970	Cytochrome P450 like_TBP	3.93896	Solyc09g065560	Sulfate transporter	-3.68156
Solyc02g071220	SlRRA2	3.12947	Solyc07g006770	Receptor like kinase, RLK	-7.31855	Solyc12g006760	unkown protein	3.83248	Solyc05g010060	Xenotropic and polytropic retrovirus receptor	-3.62575
Solyc05g006420	SlRRA1	3.12063	Solyc02g092460	Speckle-type POZ protein	-7.22411	Solyc10g009620	SlGH3-13	3.78364	Solyc08g075010	Glucose-repressible alcohol dehydrogenase transcriptional effector	-3.62154
Solyc03g062850	Transposon Ty1-PL Gag-Pol polyprotein	3.11955	Solyc08g029000	Lipoxygenase	-7.18851	Solyc12g006730	unkown protein	3.77266	Solyc08g082120	Methanol inducible protein	-3.57807
Solyc02g071040	Starch synthase	3.10273	Solyc10g080670	Unknown Protein	-7.15861	Solyc07g007780	Receptor-like kinase	3.69354	Solyc01g091320	Sterol 4-alpha-methyl-oxidase 2	-3.54046
Solyc06g017860	Serine carboxypeptidase	3.08346	Solyc03g110940	Uncharacterized aarF domain-containing protein kinase 1	-7.13765	Solyc05g052870	UDP-glucosyltransferase family 1 protein	3.67823	Solyc01g090340	Ethylene responsive transcription factor 1b	-3.53889
Solyc12g088040	Receptor-like protein kinase At3g21340	3.07348	SGN-U584010	Unknown	-7.13096	Solyc08g079020	Adenine phosphoribosyltransferase-like protein	3.659	Solyc08g079730	Mate efflux family protein	-3.52005
Solyc04g077440	Squalene monooxygenase	3.06832	Solyc06g053970	Pollen allergen	-7.12032	Solyc12g100150	LOB domain protein 4	3.65109	Solyc03g111820	Sieve element-occluding protein 3	-3.51127
SGN-U578765	unknown	3.0113	Solyc11g062200	Transposon Ty1-A Gag-Pol polyprotein	-7.11648	Solyc00g050430	BHLH transcription factor	3.64834	Solyc02g088270	Genomic DNA chromosome 5 P1 clone MUL8	-3.47606
Solyc06g005750	Sterol 4-alpha-methyl-oxidase 2	2.98018	Solyc12g006230	RING-H2 finger protein	-7.06196	SGN-U570157	unkown	3.64658	Solyc03g117800	CER1 protein (Fragment)	-3.46261
Solyc10g077040	Magnesium-protoporphyrin IX monomethyl ester	2.97876	SGN-U270924	Unknown protein	-7.01029	Solyc06g035760	Cytochrome P450	3.56769	Solyc02g078380	Aluminum-induced protein-like protein	-3.43947
Solyc08g079020	Adenine phosphoribosyltransferase-like protein	2.9431	Solyc10g078220	Cytochrome P450	-7.00554	Solyc05g007830	Expansin 2	3.538	Solyc06g060620	Nitrate transporter	-3.38409
Solyc01g090970	Cortical cell-delineating protein	2.91726	SGN-U293475	Unknown	-6.99557	Solyc01g108210	Cytochrome P450	3.51997	Solyc05g005980	Solute carrier family 15 member 4	-3.37097
Solyc10g007690	Chlorophyll a/b binding protein 8 chloroplastic	2.90674	Solyc02g078670	COP1-Interacting ProteinI 7 (CIP7) (Fragment)	-6.99319	Solyc10g050970	Ethylene responsive transcription factor 2b	3.50968	Solyc02g087060	Nodulin MtN21 family protein	-3.36514
Solyc07g008000	TBC1 domain family member 15	2.84188	Solyc04g009660	Cc-nbs-lrrresistance protein	-6.99151	Solyc03g111400	Xanthine/uracil permease family protein	3.47414	Solyc09g008760	Unknown	-3.36162
Solyc03g114450	Extracellular calcium sensing receptor	2.81798	Solyc10g076740	Isoamyl acetate-hydrolyzing esterase	-6.9626	Solyc08g016230	Copia-like polyprotein	3.45865	Solyc05g006010	Peptide transporter	-3.34784
Solyc01g079300	Stachyose synthase	2.81543	Solyc05g046010	Peroxidase	-6.94233	Solyc04g080820	SlCKX4	3.45327	Solyc04g071260	Actin	-3.31875
Solyc05g051220	Potassium channel	2.80488	Solyc12g056820	Laccase	-6.91254	Solyc02g079330	Equilibrative nucleoside transporter	3.41099	Solyc01g101210	Alpha-humulene/(-)-(E)-beta-caryophyllene synthase	-3.27173
Solyc06g051080	UDP-sugar pyrophosphorylase	2.79244	Solyc10g086280	Heavy metal-associated domain containing protein expressed	-6.8811	Solyc02g071220	SlRRA2	3.40285	SGN-U270924	Unknown protein	-3.24851
Solyc08g006690	Pectinesterase	2.78828	Solyc08g078610	Zinc knuckle (CCHC-type) family protein	-6.87534	Solyc10g047840	Ulp1 protease family C-terminal catalytic domain containing protein	3.39805	Solyc03g026280	CRT binding factor 2	-3.15003
Solyc05g052240	Chalcone--flavonone isomerase	2.74374	Solyc08g082250	Endoglucanase 1	-6.87041	Solyc00g052530	unkown protein	3.36836	Solyc07g054270	Os08g0100600 protein (Fragment)	-3.13587
Solyc04g054190	ABC-1 domain protein	2.73525	Solyc12g010180	Anthranilate synthase	-6.85458	Solyc07g044900	Unknown Protein	3.36508	XP_002309907.1	predicted protein [Populus trichocarpa]	-3.09429
Solyc03g114720	Transcription factor BIM2	2.72255	Solyc01g111580	BZIP family transcription factor (Fragment)	-6.80992	Solyc02g068670	Ankyrin repeat-containing protein At3g12360	3.31472	Solyc01g065700	Integrin-linked kinase-associated serine/threonine phosphatase 2C	-3.08859
Solyc04g008110	Histidine kinase 4	2.69361	Solyc01g098590	Phosphoglycerate mutase family protein	-6.79266	Solyc03g097420	Receptor expression-enhancing protein 5	3.30758	XM_002310849.1	Populus trichocarpa predicted protein, mRNA	-3.07624
Solyc04g078460	N(4)-(Beta-N-acetylglucosaminyl)-L-asparaginase	2.67973	Solyc08g066980	UDP-sugar transporter UST74c	-6.739	Solyc05g051220	Potassium channel	3.25964	Solyc12g011030	Xyloglucan endotransglucosylase/hydrolase 7	-3.05933
Solyc01g111570	Receptor-like kinase	2.6718	Solyc09g061420	Os02g0515000 protein (Fragment)	-6.69987	Solyc04g011780	Glutaredoxin	3.22271	Solyc04g058100	Type 2 metallothionein	-3.05754
Solyc10g079600	SlRRA3	2.65951	Solyc06g034100	Ubiquinol-cytochrome C chaperone family protein	-6.6787	Solyc09g011470	Unknown Protein	3.19651	Solyc06g061200	Glycine-rich protein TomR2	-3.05165
Solyc07g066310	photosystem II polypeptide	2.65833	Solyc04g007950	Cysteine-rich repeat secretory protein 12	-6.67297	Solyc02g093480	Lysine ketoglutarate reductase trans-splicing related 1	3.17782	Solyc06g060590	Nodulin MtN3 family protein	-3.03621
Solyc05g055290	Hydrolase alpha/beta fold family protein	2.63931	Solyc01g111880	Tyrosine-protein kinase transforming protein Src	-6.6331	Solyc01g108600	Presequence protease mitochondrial	3.16994	Solyc08g076880	Unknown Protein	-3.03421
Solyc04g057940	U-box domain-containing protein	2.63434	Solyc03g093970	Signal recognition particle 68	-6.57905	Solyc10g079700	SlRRA4	3.15342	Solyc01g006290	Peroxidase	-3.02483
Solyc10g009620	SlGH3-13	2.58334	Solyc09g005870	Cytochrome c-type biogenesis protein CcmE	-6.57002	Solyc01g111570	Receptor-like kinase	3.11733	Solyc08g065610	Vacuolar processing enzyme-1b	-3.01548
Solyc05g007830	Expansin 2	2.56405	Solyc01g005470	Cell number regulator 10	-6.47848	Solyc01g100380	Calreticulin 2 calcium-binding protein	3.0961	Solyc02g084950	Carboxyl methyltransferase 4	-2.95275
Solyc07g043130	Os12g0117400 protein (Fragment)	2.55185	Solyc12g008650	Inositol oxygenase	-6.47778	Solyc03g113430	Peptide transporter	3.09024	Solyc08g067630	Unknown Protein	-2.9041
Solyc01g006720	ABC transporter G family member 22	2.53588	Solyc02g068790	Lactosylceramide 4-alpha-galactosyltransferase	-6.4704	Solyc00g048510	Phloem lectin	3.03267	Solyc01g098500	Glucose transporter 8	-2.88968
Solyc03g005900	GDSL esterase/lipase At5g45670	2.51181	Solyc00g046580	Serine/threonine-protein phosphatase 7 long form homolog	-6.42406	Solyc05g055290	Hydrolase alpha/beta fold family protein	3.02776	Solyc05g054750	Plant-specific domain TIGR01589 family protein	-2.87352
Solyc09g091580	Uncharacterized aarF domain-containing protein kinase 1	2.50666	Solyc12g100360	Calpain-like protein	-6.40543	Solyc04g054450	LRR receptor-like serine/threonine-protein kinase RLP	3.01859	Solyc01g101220	Sesquiterpene synthase 1	-2.84695
Solyc03g111400	Xanthine/uracil permease family protein	2.50118	Solyc04g014210	ATP dependent RNA helicase	-6.38619	Solyc04g078460	N(4)-(Beta-N-acetylglucosaminyl)-L-asparaginase	3	Solyc02g078370	Anther-specific protein TA-29	-2.83139
			Solyc03g119780	Transcription initiation factor TFIID subunit	-6.38449	Solyc03g113720	SlRRA5	2.99496	Solyc11g021060	Proteinase inhibitor	-2.83028
			Solyc02g061780	NAC domain transcription factor	-6.3739	Solyc02g079990	RLK Receptor like protein putative resistance protein with an antifungal domain	2.98506	Solyc12g049620	Unknown Protein	-2.82433
			Solyc08g083310	Glucan endo-1 3-beta-glucosidase 7	-6.36322	Solyc09g010700	CM0545.320.nc protein	2.98283	Solyc01g073640	Uncharacterized oxidoreductase Mb1385	-2.82041
			Solyc07g055810	Receptor like kinaseRLK	-6.35805	Solyc10g009590	Leaf senescence protein-like	2.97686	Solyc09g089530	Proteinase inhibitor I	-2.7863
			Solyc04g011680	Cytochrome P450	-6.33129	Solyc00g121730	chromo domain containing protein	2.97341	Solyc09g063150	Glutathione S-transferase	-2.77495
			Solyc07g015980	Lysine decarboxylase	-6.31334	Solyc07g056670	Gibberellin 2-oxidase 2	2.95188	Solyc06g075410	Unknown protein	-2.76319
			Solyc01g079300	Stachyose synthase	-6.26378	Solyc09g074490	unkown protein	2.95108	Solyc10g007770	Polyadenylate-binding protein 1-like	-2.76168
			Solyc01g094910	Ferric reductase oxidase	-6.25811	Solyc04g072070	WRKY transcription factor 16	2.94739	Solyc10g017510	Cytochrome P450	-2.76032
			Solyc04g047850	Unknown protein	-6.25377	Solyc12g044210	Pol polyprotein	2.93981	Solyc06g066500	Avr9/Cf-9 rapidly elicited protein 146	-2.71476
			Solyc07g044850	WD-repeat protein-like	-6.19703	Solyc08g067360	WRKY transcription factor 9	2.91327	Solyc11g069450	Arabidopsis thaliana genomic DNA chromosome 5 P1 clone MOK16	-2.71189
			Solyc08g075520	Binding protein	-6.19294	Solyc04g008970	FIP1	2.90835	Solyc07g062550	UDP-N-acetylglucosamine 1-carboxyvinyltransferase	-2.70486
			Solyc04g082120	Prolyl endopeptidase	-6.17324	Solyc12g005620	LRR receptor-like serine/threonine-protein kinase RLP	2.90235	Solyc11g073020	Metal ion binding protein	-2.70171
			Solyc08g007400	Autophagy-related protein 8	-6.12517	Solyc11g045520	1-AMINOCYCLOPROPANE-1-CARBOXYLATE OXIDASE-like protein	2.89661	Solyc11g022590	Kunitz trypsin inhibitor 4 (Fragment)	-2.68303
			Solyc09g008200	Heavy metal-associated domain containing protein expressed	-6.12047	Solyc12g005430	Acyltransferase-like protein	2.87339	Solyc03g119390	Transcription factor	-2.66247
			Solyc12g035360	Histone H3 methyltransferase complex and RNA cleavage factor II complex subunit SWD2	-6.10708	Solyc06g061080	NAC-domain transcription factor	2.86068	Solyc10g006430	Unknown Protein	-2.66247
			Solyc08g082610	Genomic DNA chromosome 5 P1 clone MJC20	-6.10185	Solyc05g011920	ACT domain-containing protein	2.84627	Solyc03g098780	Kunitz-type protease inhibitor	-2.63492
			Solyc02g082940	Os03g0291800 protein (Fragment)	-6.03634	Solyc02g072070	Receptor-like kinase	2.84473	Solyc03g097600	MtN3-like protein	-2.62558
			Solyc12g100010	LRR receptor-like serine/threonine-protein kinase RLP	-6.01758	Solyc02g023950	Receptor like kinase, RLK	2.83599	Solyc10g008410	RING finger protein 5	-2.6177
			Solyc07g017600	Pectinesterase	-5.99081	Solyc07g006480	LRR receptor-like serine/threonine-protein kinase FEI 1	2.78899	Solyc04g040120	Omega-6 fatty acid desaturase	-2.61143
			Solyc09g011490	Glutathione S-transferase-like protein	-5.98965	Solyc05g010620	Pentatricopeptide repeat-containing protein	2.78175	Solyc10g007070	CT099 (Fragment)	-2.60821
			Solyc06g084220	Unknown Protein	-5.91181	Solyc08g077110	NAC domain protein IPR003441	2.77579	Solyc01g108490	Serine carboxypeptidase 1	-2.60706
			Solyc04g007220	Unknown protein	-5.89515	SGN-U601705	unkown	2.76784	Solyc12g009930	UDP-glucuronosyltransferase 1-6	-2.60265
			Solyc12g042680	Mutator-like transposase	-5.89445	Solyc07g014640	Galactokinase-like protein	2.76153	Solyc09g092750	Unknown Protein	-2.59838
			Solyc01g089980	Engulfment and cell motility protein	-5.88883	Solyc01g079550	Multidrug resistance protein ABC transporter family protein	2.68392	Solyc06g075090	Lysine decarboxylase-like protein	-2.58402
			Solyc01g088380	DNA helicase	-5.86382	Solyc07g032120	Retroelement pol polyprotein-like	2.68143	Solyc09g084450	Chymotrypsin inhibitor-2	-2.56269
			Solyc03g115840	DnaJ homolog subfamily C member 10	-5.86325	Solyc04g072920	Trehalose-6-phosphate phosphatase	2.67875	Solyc01g008420	Mate efflux family protein	-2.56194
			Solyc04g054140	Ryanodine receptor	-5.85856	XP_002306943	predicted protein [Populus trichocarpa]	2.64232	Solyc09g010350	Genomic DNA chromosome 5 P1 clone MSH12	-2.53886
			Solyc09g090440	Pentatricopeptide repeat protein	-5.85397	Solyc07g020870	U-box domain-containing protein	2.60221	Solyc08g067940	Unknown Protein	-2.5285
			Solyc07g021600	Uknown protein	-5.84396	Solyc09g075820	Solute carrier family facilitated glucose transporter member 3	2.58136	Solyc10g084880	Avr9/Cf-9 rapidly elicited protein 137	-2.51511
			Solyc03g053100	Kinesin like protein	-5.83746	Solyc06g049030	Ring finger protein	2.58095
			XP_002317245.1	predicted protein [Populus trichocarpa]	-5.83331	Solyc02g092110	Phytosulfokines 3	2.57721
			Solyc05g008770	Amino acid permease	-5.82977	Solyc02g020990	Unknown protein	2.561
			Solyc01g007640	Ycf2	-5.81482	Solyc04g039720	Unknown Protein	2.55833
			Solyc08g074890	Unknown Protein	-5.79734	Solyc10g085380	Alcohol dehydrogenase (Fragment)	2.55341
			Solyc01g095930	O-acyltransferase WSD1	-5.79664	Solyc07g062480	S-locus glycoprotein (Fragment)	2.52582
			Solyc01g087610	Alpha-N-acetylglucosaminidase	-5.79542	Solyc04g048900	Calreticulin 2 calcium-binding protein	2.51407
			Solyc03g118190	Ethylene responsive transcription factor 2a	-5.78339	AAW22882	unknown [Solanum lycopersicum]	2.5
			Solyc11g013490	Beta-1,3-galactosyltransferase 6	-5.73653
			Solyc12g015910	Cysteine desulfuration protein SufE	-5.69282
			Solyc12g014560	Cell division protein ftsZ	-5.69076
