# Supplementary material for: Transcriptome Analysis of Cytokinin Response in Tomato Leaves
Source: PLoS One. 2013 Jan 25;8(1):e55090. doi: 10.1371/journal.pone.0055090 (PMC3555872; doi:10.1371/journal.pone.0055090)
Supplement: Table S6 — Transcripts identified as more abundant (2.5 log2 fold greater than the other age sample at that treatment time) in control leaf samples. Only the top 100 transcripts were listed in the table. FC = fold change. (XLSX) [file pone.0055090.s006.xlsx]

## Sheet: Sheet1
	Transcripts more abundant in young plants (2h DMSO)			Transcripts more abundant in older plants (2h DMSO)			Transcripts more abundant in young plants (24h DMSO)			Transcripts more abundant in older plants (24h DMSO)
Solyc_ID	Solyc_Description	log2FC*	Solyc_ID	Solyc_Description	log2FC	Solyc_ID	Solyc_Description	log2FC	Solyc_ID	Solyc_Description	log2FC
Solyc07g007700	Isoprenylcysteine carboxyl methyltransferase	11.01	Solyc07g008520	Peptide transporter	7.64	Solyc07g014730	Phospholipase A2	6.22519	Solyc01g109320	Multidrug resistance protein mdtK	6.5966
SGN-U568332	Unknown	10.88	Solyc07g006630	CONSTANS-like protein	7.35	Solyc08g023660	Major latex-like protein	5.87786	Solyc00g174340	Pathogenesis-related protein 1b	6.00055
Solyc05g053610	ATP-binding cassette transporter	10.5798	Solyc09g007010	Pathogenesis related protein PR-1	6.94	Solyc06g083720	Subtilisin-like protease	5.73578	Solyc01g060350	Unknown protein	5.38916
Solyc08g006420	Myosin-like protein (Fragment)	9.69	Solyc09g064910	tRNA dimethylallyltransferase	6.93	Solyc08g008480	Myb transcription factor	5.42916	Solyc09g007010	Pathogenesis related protein PR-1	5.38469
Solyc10g047910	Unknown	9.56	Solyc07g044900	Unknown Protein	6.87	Solyc04g015620	Os01g0611000 protein	5.35814	Solyc09g090210	Serine/threonine protein kinase	5.34889
Solyc10g008070	Bromodomain-containing RNA-binding protein 2	9.39	Solyc00g174340	Pathogenesis-related protein 1b	6.77	Solyc06g036130	Multidrug resistance protein mdtK	5.29661	Solyc10g075150	Non-specific lipid-transfer protein	5.31149
SGN-U570157	Unknown	9.36	Solyc01g099990	F-box protein PP2-B1	6.01	Solyc01g014290	Unknown Protein	5.18455	Solyc02g072070	Receptor-like kinase	4.82606
Solyc03g113630	Pentatricopeptide repeat-containing protein	9.27	Solyc04g077990	LOB domain protein 38	5.89	Solyc01g014280	Unknown Protein	5.16246	Solyc07g017880	Peroxidase	4.62852
SGN-U592967	Unknown	9.13	Solyc03g098790	Kunitz-type protease inhibitor	5.72	Solyc12g005480	Targeting protein for Xklp2 containing protein expressed	5.12312	Solyc06g082620	RNA-binding protein PNO1-like protein	4.61543
SGN-U293475	Unknown	9.07	Solyc04g082120	Prolyl endopeptidase	5.29	Solyc02g070970	Chlorophyll a/b binding protein	5.0866	Solyc02g062710	Hydroxycinnamoyl transferase	4.61189
Solyc04g077030	Xylulose kinase	8.77	Solyc07g017880	Peroxidase	5.16	Solyc07g043390	Cellulose synthase family protein expressed	5.04111	Solyc05g053610	ATP-binding cassette transporter	4.586
Solyc02g089720	Endo-beta-1 3-glucanase	8.68	Solyc12g005380	Diacylglycerol kinase	5.1	Solyc02g081120	Knotted-1-like homeobox protein H1	4.96912	Solyc12g006570	Germacrene-D synthase	4.52201
Solyc02g081480	Receptor kinase	8.55	Solyc07g044910	Unknown Protein	5.05	Solyc04g077540	Kinesin-like protein	4.62086	Solyc07g052140	(-)-germacrene D synthase	4.45612
Solyc03g064010	Receptor like kinase RLK	8.38	Solyc12g006730	Unknown Protein	5.05	Solyc02g070950	Chlorophyll a/b binding protein	4.61811	Solyc10g050970	Ethylene responsive transcription factor 2b	4.44183
Solyc11g072930	LRR receptor-like serine/threonine-protein kinase, RLP	8.24	Solyc07g043130	Os12g0117400 protein (Fragment)	4.85	Solyc08g013950	Unknown	4.55821	Solyc07g014640	Galactokinase-like protein	4.26943
Solyc07g062500	Cytochrome P450	8.07	Solyc04g016430	SlCKX5	4.83	Solyc09g082660	Caffeoyl-CoA O-methyltransferase	4.55743	Solyc03g113430	Peptide transporter	4.19737
Solyc05g032660	Dehydrogenase/ reductase 3	8.05	Solyc07g055990	Xyloglucan endotransglucosylase/hydrolase 7	4.82	Solyc06g069730	Chlorophyll a/b binding protein chloroplastic	4.42834	Solyc07g051940	Alpha-humulene/(-)-(E)-beta-caryophyllene synthase	4.07223
Solyc10g076250	Aminotransferase like protein	8.03	Solyc09g090210	Serine/threonine protein kinase	4.76	Solyc03g033260	Maltose excess protein 1	4.42711	Solyc07g008080	WD repeat-containing protein 11	3.98316
Solyc11g066080	Genomic DNA chromosome 5 BAC clone F2O15	8.01	Solyc03g006030	Receptor like kinase RLK	4.63	Solyc11g071200	Unknown Protein	4.35777	Solyc02g020990	Unknown protein	3.94953
Solyc05g007960	Os01g0841200 protein (Fragment)	7.99	Solyc07g007250	Metallocarboxypeptidase inhibitor	4.59	Solyc03g026040	Receptor like kinaseRLK	4.35739	Solyc07g026650	1-aminocyclopropane-1-carboxylate oxidase	3.94692
Solyc08g028970	Unknown protein	7.98	Solyc03g098780	Kunitz-type protease inhibitor	4.55	Solyc02g069490	FAD linked oxidase domain protein	4.32834	Solyc06g007180	Asparagine synthase	3.93421
Solyc08g082250	Endoglucanase 1	7.98	Solyc03g020060	Proteinase inhibitor II	4.42	Solyc06g006000	Unknown Protein	4.32026	Solyc00g052530	Unknown protein	3.90916
Solyc04g011680	Cytochrome P450	7.93	Solyc10g050510	Unknown Protein	4.31	Solyc03g026280	CRT binding factor 2	4.24023	Solyc12g056820	Laccase	3.87249
Solyc09g061420	Os02g0515000 protein	7.83	Solyc11g021060	Proteinase inhibitor	4.29	Solyc07g055950	Meiosis 5	4.23415	Solyc01g100380	Calreticulin 2 calcium-binding protein	3.79862
Solyc02g092460	Speckle-type POZ protein	7.8	Solyc04g057940	U-box domain-containing protein	4.21	Solyc05g056050	Chlorophyll a/b binding protein 6A, chloroplastic	4.20739	Solyc11g064960	Unknown	3.74985
Solyc04g025650	Monooxygenase FAD-binding IPR003042Aromatic-ring hydroxylase-like	7.75	Solyc08g077330	Expansin-like protein	4.21	Solyc12g098590	UDP-glucosyltransferase family 1 protein	4.09552	Solyc03g083320	Calcineurin B-like calcium binding protein	3.74152
Solyc10g086280	Heavy metal-associated domain containing protein expressed	7.56	Solyc11g006910	Ferredoxin	4.17	Solyc05g006010	Peptide transporter	4.08483	Solyc06g035520	Acetyl esterase	3.6352
Solyc03g110940	Uncharacterized aarF domain-containing protein kinase 1	7.49	Solyc04g011840	Glutaredoxin	4.08	Solyc02g068760	Pentatricopeptide repeat-containing protein	4.08275	Solyc01g099990	F-box protein PP2-B1	3.60496
Solyc07g008470	Macrophage migration inhibitory factor family protein	7.45	Solyc04g071790	Cytochrome P450	4.08	Solyc08g007240	Hydrolase NUDIX family protein	4.07461	Solyc12g019720	Mutator-like transposase	3.59628
Solyc02g078450	Tetraspanin family protein	7.42	Solyc09g084490	Proteinase inhibitor I	4.06	Solyc02g071010	Chlorophyll a/b binding protein	4.06184	Solyc09g010700	CM0545.320.nc protein	3.51622
Solyc06g005520	ATP binding / serine-threonine kinase	7.41	Solyc04g011860	Glutaredoxin	4.00614	Solyc02g070990	Chlorophyll a/b binding protein	4.05813	Solyc02g080080	RLK Receptor like protein putative resistance protein with an antifungal domain	3.50731
Solyc10g005880	Uridine kinase	7.24	Solyc08g059690	AT-hook motif nuclear localized protein 1	3.97	Solyc07g043480	UDP-glucose glucosyltransferase	3.99799	Solyc06g068890	Unknown Protein	3.36162
Solyc11g017280	Receptor like kinase RLK	7.19	Solyc02g086820	Carbonic anhydrase	3.96	Solyc03g115900	Chlorophyll a/b binding protein chloroplastic	3.98385	Solyc07g055690	S-locus-specific glycoprotein S6	3.33466
Solyc06g082620	RNA-binding protein PNO1-like protein	7.14	Solyc09g084470	Proteinase inhibitor I	3.96	Solyc01g005300	Flavin-binding kelch domain F box protein	3.97519	Solyc12g056670	Unknown Protein	3.32122
Solyc03g033260	Maltose excess protein 1, chloroplastic	7.1	Solyc12g096200	MYB transcription factor	3.94	Solyc04g071340	Fructose-1 6-bisphosphatase class 1	3.97447	Solyc01g006550	LRR receptor-like serine/threonine-protein kinase, RLP	3.30287
Solyc01g079300	Stachyose synthase	7.08077	Solyc04g074680	Unknown Protein	3.9	Solyc07g041720	Oxalate oxidase-like germin 171	3.91113	Solyc01g079140	Unknown Protein	3.27634
Solyc08g078610	Zinc knuckle (CCHC-type) family protein	7.08	Solyc06g017860	Serine carboxypeptidase	3.87	Solyc02g070980	Chlorophyll a/b binding protein	3.90517	SGN-U573011	Unknown	3.26705
Solyc12g006230	RING-H2 finger protein	7.08	Solyc11g022590	Kunitz trypsin inhibitor 4 (Fragment)	3.85	Solyc12g098130	Unknown Protein	3.90272	SGN-U582192	Unknown	3.17367
Solyc09g005870	Cytochrome c-type biogenesis protein CcmE	7.04	Solyc09g008760	Unknown	3.81	Solyc06g062370	Acid phosphatase	3.89348	SGN-U604059	Unknown	3.16047
Solyc04g014210	ATP dependent RNA helicase	7.03	Solyc07g051940	Alpha-humulene/(-)-(E)-beta-caryophyllene synthase	3.78787	Solyc07g006620	Receptor-like kinase	3.85833	Solyc10g018120	Unknown Protein	3.15379
Solyc04g007950	Cysteine-rich repeat secretory protein 12	6.95	Solyc03g025720	Long-chain-fatty-acid--CoA ligase	3.75	Solyc04g016200	UDP-glucosyltransferase HvUGT5876	3.85589	Solyc07g062140	Alpha alpha-trehalose-phosphate synthase	3.1434
Solyc12g042680	Mutator-like transposase	6.93	Solyc06g084170	Unknown Protein	3.74	Solyc07g054580	SlGH3-8	3.84491	Solyc02g081300	Sucrose synthase	3.12621
Solyc09g097860	Kinesin-like protein	6.92	SGN-U577672	sesquiterpene synthase [Fabiana imbricata]	3.71	Solyc02g076690	Cathepsin B-like cysteine proteinase	3.84099	Solyc05g052870	UDP-glucosyltransferase family 1 protein	3.12536
SGN-U270924	Unknown protein	6.89	Solyc03g116530	Glyoxalase/bleomycin resistance protein/dioxygenase	3.69	Solyc01g107650	Receptor like kinaseRLK	3.80128	Solyc12g044190	Nbs-lrr resistance protein	3.11604
Solyc01g091380	Microtubule-associated protein MAP65-1a	6.88	Solyc05g054750	Plant-specific domain TIGR01589 family protein	3.69	Solyc01g095240	Unknown Protein	3.7128	Solyc11g065910	Unknown protein	3.09036
Solyc01g007640	Ycf2	6.84	Solyc05g015980	Unknown Protein	3.67	Solyc02g085020	Dihydroflavonol 4-reductase	3.71152	Solyc07g007780	Receptor-like kinase	3.07063
XP_003603725	hypothetical protein MTR_3g113080 [Medicago truncatula]	6.82	Solyc01g067740	Superoxide dismutase	3.65	Solyc01g066640	Os04g0405500 protein (Fragment)	3.70636	Solyc04g015220	Nbs-lrr resistance protein	3.04504
Solyc04g007220	Unknown protein	6.81	Solyc12g006570	Germacrene-D synthase	3.65	Solyc01g091320	Sterol 4-alpha-methyl-oxidase 2	3.65782	Solyc04g011860	Glutaredoxin	3.03899
Solyc01g108190	calmodulin-like protein	6.8	Solyc12g009930	UDP-glucuronosyltransferase 1-6	3.65	Solyc12g005020	Ring H2 finger protein	3.65599	Solyc07g062480	S-locus glycoprotein (Fragment)	3.0362
Solyc08g007400	Autophagy-related protein 8	6.78	Solyc02g068000	F-box family protein	3.61	Solyc02g071000	Chlorophyll a/b binding protein	3.65185	Solyc12g041880	Homology to unknown gene	3.02703
Solyc09g005260	Calcium/proton exchanger	6.66	Solyc05g006420	SlRRA1	3.6	Solyc07g063600	Chlorophyll a/b binding protein chloroplastic	3.64747	Solyc12g027540	Unknown Protein	3.00327
Solyc01g095930	O-acyltransferase WSD1	6.64	SGN-U582500	Hcr9-OR3A [Solanum pimpinellifolium]	3.57	Solyc12g011010	Meiosis 5	3.62258	Solyc09g074490	Unknown protein	3.00218
Solyc02g089870	Ring figure protein 5	6.62	Solyc01g108350	Copper ion binding protein	3.56	Solyc05g005980	Solute carrier family 15 member 4	3.62194	Solyc03g121590	Protein SEY1	2.9961
Solyc02g032950	Transcription factor WRKY	6.61	Solyc09g084450	Chymotrypsin inhibitor-2	3.53	SGN-U603994	Unknown	3.60481	Solyc07g008540	CONSTANS-like zinc finger protein	2.98316
Solyc03g119780	Transcription initiation factor TFIID subunit	6.6	SGN-U582788	Unknown	3.5	Solyc02g070970	Chlorophyll a/b binding protein	3.59738	Solyc11g069000	T-complex protein 1 subunit beta	2.96501
Solyc09g091860	Poly(A) RNA polymerase protein 1	6.5	Solyc02g081300	Sucrose synthase	3.49	Solyc03g081240	Pseudo response regulator	3.56589	Solyc01g086680	Glutathione S-transferase	2.96077
Solyc11g013490	Beta-1 3-galactosyltransferase 6	6.48	Solyc01g008690	GDP-mannose transporter	3.43	Solyc04g009790	Multidrug resistance protein mdtK	3.53683	Solyc07g062370	Erythrocyte membrane protein 3	2.92496
Solyc12g035360	Histone H3 methyltransferase complex and RNA cleavage factor II complex subunit SWD2	6.48	Solyc10g047840	Ulp1 protease family C-terminal catalytic domain containing protein	3.41	Solyc03g007690	ABC transporter G family member 8	3.52743	Solyc12g042680	Mutator-like transposase	2.90916
Solyc06g075410	Unknown protein	6.46	Solyc06g005310	MYB transcription factor	3.37	Solyc08g062960	Heat stress transcription factor A3	3.52717	Solyc07g020870	U-box domain-containing protein	2.9047
Solyc07g006770	Receptor like kinase, RLK	6.45	Solyc01g006550	LRR receptor-like serine/threonine-protein kinase RLP	3.36	Solyc04g078880	Genomic DNA chromosome 5 P1 clone MBD2	3.50869	Solyc02g061780	NAC domain transcription factor	2.90039
SGN-U580983	ribulose bisphosphate carboxylase small chain 3B / RuBisCO small subunit 3B	6.43	Solyc11g011340	Alcohol dehydrogenase	3.34	Solyc12g006140	Chlorophyll a/b binding protein chloroplastic	3.49479	Solyc10g083700	Cytochrome P450	2.89705
Solyc03g112920	C2H2L domain class transcription factor	6.43	Solyc06g033850	Dehydration-responsive element-binding protein 2D	3.31	Solyc03g117800	CER1 protein (Fragment)	3.48212	Solyc11g012660	microtubule associated protein Type 5	2.87605
Solyc11g069050	4-coumarate-CoA ligase	6.43	Solyc03g117050	Aquaporin	3.29	Solyc02g070800	Ycf23 protein	3.47815	Solyc02g086460	Unknown	2.87177
Solyc03g005870	Eukaryotic translation initiation factor 4E	6.38	Solyc06g068890	Unknown Protein	3.29	Solyc07g007860	Proline rich protein (Fragment)	3.47694	Solyc07g052370	Cytochrome P450	2.86937
Solyc02g068790	Lactosylceramide 4-alpha-galactosyltransferase	6.36	Solyc12g005730	Glycosyltransferase-like protein	3.28	Solyc02g078450	Tetraspanin family protein	3.46771	Solyc07g006770	Receptor like kinase, RLK	2.86834
Solyc09g009530	Hydrolase alpha/beta fold family protein	6.36	Solyc07g008000	TBC1 domain family member 15	3.25	Solyc08g008610	Hydrolase alpha/beta fold family protein	3.45172	Solyc03g112030	Cytochrome P450	2.8664
Solyc10g076740	Isoamyl acetate-hydrolyzing esterase	6.34	Solyc03g044180	ABC transporter family protein	3.22	Solyc12g042760	LRR receptor-like serine/threonine-protein kinase RLP	3.44536	Solyc08g061880	Peroxisome biogenesis factor 10	2.86563
Solyc06g034100	Ubiquinol-cytochrome C chaperone family protein	6.33	Solyc00g058890	Unknown Protein	3.19	Solyc08g078940	Cortical cell-delineating protein	3.44293	Solyc03g080190	Flavanone 3-hydroxylase-like protein	2.86504
Solyc06g005790	DNA-directed RNA polymerase II subunit	6.31	Solyc03g062850	Transposon Ty1-PL Gag-Pol polyprotein	3.19	Solyc01g066570	Genomic DNA chromosome 5 TAC clone K14A3	3.43859	Solyc12g005730	Glycosyltransferase-like protein	2.86349
SGN-U584010	Unknown	6.27	Solyc03g078490	UDP-glucuronosyltransferase	3.19	Solyc10g084020	Auxin responsive SAUR protein	3.42687	Solyc03g098670	Kunitz trypsin inhibitor	2.83078
Solyc12g008650	Inositol oxygenase	6.27	Solyc08g016210	LRR receptor-like serine/threonine-protein kinase, RLP	3.18	Solyc02g063180	UDP-N-acetylenolpyruvoylglucosamine reductase	3.39673	Solyc01g008410	LRR receptor-like serine/threonine-protein kinase RLP	2.81542
Solyc04g057970	Unknown Protein	6.26	Solyc00g042130	ATP synthase subunit alpha	3.16	Solyc08g067940	Unknown Protein	3.3851	Solyc04g011490	UPF0497 membrane protein 17	2.81066
Solyc02g089160	Cytochrome P450	6.22	Solyc05g041410	Unknown Protein	3.15	SGN-U574850	Unknown	3.37219	Solyc01g009690	LRR receptor-like serine/threonine-protein kinase RLP	2.7893
Solyc05g008770	Amino acid permease	6.22	Solyc08g067160	Acyl-protein thioesterase 2	3.15	Solyc07g043420	2-oxoglutarate-dependent dioxygenase	3.36761	Solyc04g054260	Cytochrome P450	2.78462
Solyc09g011830	Transcription antitermination protein nusG	6.22	SGN-U578697	Unknown	3.14	Solyc08g074680	Polyphenol oxidase	3.35927	Solyc07g039570	Transcription factor	2.77776
Solyc09g090810	Euchromatic histone lysine N-methyltransferase 2	6.2	Solyc01g100920	Nodulin-like protein	3.13	Solyc12g088690	Glucosyltransferase	3.35908	Solyc03g044180	ABC transporter family protein	2.77735
Solyc11g007980	Cytochrome P450	6.15	Solyc04g054740	Inositol-3-phosphate synthase	3.13	Solyc02g090540	Short-chain dehydrogenase/reductase family protein	3.35777	Solyc01g008690	GDP-mannose transporter	2.76735
Solyc02g078670	COP1-Interacting ProteinI 7 (CIP7) (Fragment)	6.14	Solyc03g033790	Cell division protease ftsH homolog 3	3.12	Solyc08g006280	Transcriptional factor B3 family protein	3.35738	Solyc01g091870	Major facilitator superfamily domain-containing protein 8	2.76685
Solyc12g014560	Cell division protein ftsZ	6.14	SGN-U601705	Unknown	3.1	Solyc10g008410	RING finger protein 5	3.34891	Solyc03g110930	30S ribosomal protein S21 chloroplastic (Fragment)	2.7574
Solyc07g054500	Receptor like kinase RLK	6.12	Solyc03g093120	Xyloglucan endotransglucosylase/hydrolase 9	3.1	Solyc04g076190	Aspartic proteinase nepenthesin-1	3.34066	Solyc12g100020	LRR receptor-like serine/threonine-protein kinase RLP	2.75123
Solyc12g042920	Cytochrome c1	6.12	Solyc04g015220	Nbs-lrr resistance protein	3.07	Solyc07g043460	Cytochrome P450	3.34023	Solyc07g008240	Non-symbiotic hemoglobin protein	2.74682
Solyc03g093180	Peroxisomal membrane protein 11-4	6.09	Solyc11g007690	Pyruvate kinase	3.07	Solyc12g087940	Aspartic proteinase nepenthesin-1	3.28705	Solyc06g075100	Glycosyl transferase family 2 protein	2.7351
Solyc12g100360	Calpain-like protein	6.08	Solyc12g011030	Xyloglucan endotransglucosylase/hydrolase 7	3.07	Solyc07g055050	ATP synthase I-like protein	3.28226	Solyc05g015850	WRKY transcription factor-b	2.72855
Solyc12g027780	HAT family dimerisation domain containing protein expressed	6.07	Solyc04g072070	WRKY transcription factor 16	3.02	Solyc01g073640	Uncharacterized oxidoreductase Mb1385	3.2709	Solyc08g077330	Expansin-like protein	2.72334
Solyc08g075520	Binding protein	6.05	Solyc07g042550	Sucrose synthase	3.02	Solyc08g008370	Genomic DNA chromosome 5 P1 clone MJC20	3.26146	Solyc06g061040	Ribose-phosphate pyrophosphokinase	2.72265
Solyc01g111880	Tyrosine-protein kinase transforming protein Src	5.99	Solyc12g006760	Unknown	3.02	Solyc09g018020	Expansin	3.22686	Solyc04g054450	LRR receptor-like serine/threonine-protein kinase RLP	2.71919
Solyc03g093970	Signal recognition particle 68	5.99	Solyc10g009620	SlGH3-13	3.01	Solyc04g050570	GDSL esterase/lipase At5g33370	3.21327	Solyc02g065090	Patatin-like protein 3	2.70523
Solyc07g065390	Unknown Protein	5.98	Solyc07g007360	Os07g0175100 protein (Fragment)	2.99078	Solyc06g005260	Cytoplasmic glutaredoxin thioltransferase glutathione-dependent disulfide oxidoreductase	3.20656	Solyc09g074890	Rapid alkalinization factor 1	2.70236
Solyc01g066740	Transducin family protein (Fragment)	5.93	Solyc08g016270	LRR receptor-like serine/threonine-protein kinase RLP	2.98965	Solyc12g014140	Transcription factor CYCLOIDEA	3.20642	Solyc05g010620	Pentatricopeptide repeat-containing protein	2.69582
Solyc03g115840	DnaJ homolog subfamily C member 10	5.91	Solyc07g041900	Cathepsin L-like cysteine proteinase	2.96816	Solyc01g088400	CER1	3.2013	Solyc06g051090	U-box domain-containing protein 13	2.69244
Solyc12g015910	Cysteine desulfuration protein SufE	5.91	Solyc09g007520	Peroxidase	2.96798	Solyc10g006900	Protochlorophyllide reductase	3.19078	SGN-U581378	Caffeoyl-CoA O-methyltransferase	2.67983
Solyc08g015780	F-box/ankyrin repeat protein SKIP35	5.89	Solyc01g008390	LRR receptor-like serine/threonine-protein kinase RLP	2.95178	Solyc09g098490	Epsin 2	3.181	Solyc04g011840	Glutaredoxin	2.6798
Solyc07g015980	Lysine decarboxylase	5.88	Solyc04g040130	Omega-6 fatty acid desaturase	2.94465	Solyc07g045090	Alcohol dehydrogenase zinc-binding domain protein	3.18026	Solyc07g042550	Sucrose synthase	2.67144
Solyc07g044850	WD-repeat protein-like	5.86086	Solyc08g013950	Unknown Protein	2.94142	Solyc12g006240	CONSTANS-like zinc finger protein	3.17351	Solyc08g074640	Polyphenol oxidase	2.66948
Solyc09g065760	Plant-specific domain TIGR01615 family protein	5.85202	Solyc05g053610	ATP-binding cassette transporter	2.94137	Solyc10g075100	Non-specific lipid-transfer protein	3.1519	Solyc06g052020	Unknown Protein	2.66684
Solyc04g074130	Mitochondrial carrier protein expressed	5.80655	Solyc05g045730	Unknown Protein	2.93768	Solyc08g013760	F-box family protein	3.15115	Solyc04g077990	LOB domain protein 38	2.65718
Solyc01g098590	Phosphoglycerate mutase family protein	5.77077	Solyc12g056600	Short chain alcohol dehydrogenase	2.93203	Solyc10g087040	cytochrome P450	3.13761	Solyc05g012780	cDNA clone J075153F01 full insert sequence	2.65205
Solyc06g053970	Pollen allergen	5.76425	Solyc02g061770	Endochitinase (Chitinase)	2.92847	Solyc12g044280	Photosystem I reaction center subunit VI chloroplastic	3.12431	Solyc12g044700	F-box family protein	2.65118
Solyc12g014210	RNA binding protein	5.76223	Solyc03g083320	Calcineurin B-like calcium binding protein	2.9257	Solyc12g100030	LRR receptor-like serine/threonine-protein kinase RLP	3.09885	Solyc01g108350	Copper ion binding protein	2.6492
Solyc01g094340	Acetyl-coenzyme A carboxylase carboxyl transferase subunit alpha	5.74082	Solyc05g010060	Xenotropic and polytropic retrovirus receptor	2.92191	Solyc02g088430	ATP-dependent DNA helicase RecQ	3.08718	Solyc02g078370	Anther-specific protein TA-29	2.63991
